# EM and component-wise boosting for Hidden Markov Models: a machine-learning approach to capture-recapture

Robert W. Rankin<sup>a,\*</sup>

<sup>a</sup>*Cetacean Research Unit, School of Veterinary and Life Sciences, Murdoch University, Australia*

---

---

## 1 Abstract

2 This study presents a new boosting method for capture-recapture models, rooted in predictive-  
3 performance and machine-learning. The regularization algorithm combines Expectation-Maximization and  
4 boosting to yield a type of multimodel inference, including automatic variable selection and control of model  
5 complexity. By analyzing simulations and a real dataset, this study shows the qualitatively similar estimates  
6 between AICc model-averaging and boosted capture-recapture for the CJS model. I discuss a number of  
7 benefits of boosting for capture-recapture, including: i) ability to fit non-linear patterns (regression-trees,  
8 splines); ii) sparser, simpler models that are less prone to over-fitting, singularities or boundary-value esti-  
9 mates than conventional methods; iii) an inference paradigm that is rooted in predictive-performance and  
10 free of p-values or 95% confidence intervals; and v) estimates that are slightly biased, but are more stable over  
11 multiple realizations of the data. Finally, I discuss some philosophical considerations to help practitioners  
12 motivate the use of either prediction-optimal methods (AIC, boosting) or model-consistent methods. The  
13 boosted capture-recapture framework is highly extensible and could provide a rich, unified framework for  
14 addressing many topics in capture-recapture, such as spatial capture-recapture, individual heterogeneity, and  
15 non-linear effects.

16  
17 *Keywords: capture-recapture, boosting, machine-learning, model-selection, marked animals, high-dimensional*  
18 *data*

## 19 1. Introduction

20 In this study, I introduce boosting for Hidden-Markov Models (HMM) with a particular focus on capture-  
21 recapture models. It is targeted at capture-recapture practitioners who desire model parsimony under low-  
22 sample sizes and high-dimensional settings. Capture-recapture systems are perennially in an situation of  
23 high model-uncertainty (Johnson & Omland, 2004) and would benefit from an inference-paradigm that is  
24 flexible, extensible and rooted in good *predictive performance*. Some questions are the following. Can we find  
25 a simple model out of the hundreds or millions of plausible “fixed-effects” models? Can we correctly identify

---

\*Corresponding author. E-mail: robertw.rankin@gmail.com

26 a sparse set of highly influential covariates in high-dimensional situations? Can the method accommodate  
27 non-linear relationships and interactions (e.g., regression trees, kernels and splines) without over-fitting? Can  
28 the method avoid the scourge of singularities and boundary-value estimates that trouble MLE-based models  
29 and their model-averaged derivatives? How does the method compare to other popular multimodel inference  
30 techniques, such as AICc model-averaging?

31 A motivating model will be the Cormack-Jolly-Seber (CJS) capture-recapture model, with a focus on  
32 which covariates influence the survival of an open population of marked animals under imperfect detection.  
33 While there are many regularization and variable selection techniques in univariate regression models, the  
34 problem becomes combinatorially difficult for HMMs such as capture-recapture models: we must consider  
35 multiple plausible specifications for both the transition process (survival), as well as the emission process  
36 (capture probability).

37 The issues of model selection and multimodel inference are front-and-centre in most capture-recapture  
38 studies. For example, the popular Program MARK (White & Burnham, 1999) is strongly allied to the model-  
39 averaging ideas of Burnham, Anderson, Buckland and others (Buckland et al., 1997; Anderson et al., 2000;  
40 Burnham & Anderson, 2004, 2014). By default, the program offers AICc-weighted averages (Akaike, 1974)  
41 of survival and capture probability. The widespread use of model-averaging in the capture-recapture field  
42 reflects an early appreciation by researchers for the *model uncertainty* inherent to capture-recapture: every  
43 analysis has dozens or thousands of plausible fixed-effect models, including, at a minimum, time-varying vs  
44 time-invariant processes. However, such *post-hoc* model-selection and/or averaging become computationally  
45 unfeasible with just a few extra covariates, due to the combinatorial explosion in the number of plausible  
46 models. Secondly, even if one could realistically compute every model, the AIC/AICc tends to favour more  
47 complex models (Shao, 1997; Hooten & Hobbs, 2015), which, in a capture-recapture context, can have  
48 singularities or boundary-value estimates (like 100% survival or 100% capture probability; Rankin et al.,  
49 2016; Hunt et al., 2016). This latter problem is rarely appreciated, but has motivated the development of  
50 Bayesian models to encourage parsimony under sparse data (Schofield et al., 2009; Schofield & Barker, 2011;  
51 Rankin et al., 2014, 2016)

52 Clearly, methods are needed to address the dual challenge of variable selection and low-sample sizes. Also,  
53 we should favour flexible techniques that can accommodate different functional forms (such as regression trees,  
54 splines, random effects) and find covariate-interactions, without over-fitting or producing boundary-value  
55 estimates.

56 Hand & Vinciotti (2003) and Burnham & Anderson (2004) hinted at a possible contender to the model-  
57 averaging approach when they suggested a parallel between multimodel inference and boosting: whereas  
58 model-averaging weights many fixed-effect models in a *post-hoc* manner, boosting sequentially combines  
59 hundreds or thousands of simple *weak learners* to yield a strong statistical model in aggregate. Most ecologists  
60 are familiar with boosting for univariate regression and classifications tasks (Elith et al., 2008; Kneib et al.,  
61 2009; Oppel et al., 2009; Hothorn et al., 2010; Tyne et al., 2015), but the recently developed *component-wise*

62 *boosting* and *gamboostLSS* algorithms (Bühlmann & Yu, 2003; Schmid & Hothorn, 2008b; Schmid et al., 2010;  
63 Mayr et al., 2012) opened the way for complex hierarchical distributions with many components (Hothorn  
64 et al., 2010; Hutchinson et al., 2011; Schmid et al., 2013; Hofner et al., 2014). Under this boosting framework,  
65 each boosting iteration alternates between fitting the capture probability parameter (conditional on survival),  
66 and then fitting the survival component (conditional on the capture probabilities). Plus, boosting offers a  
67 wide variety of possible weak learners, from ordinary least squares to splines and CART-like trees (Hothorn  
68 et al., 2006; Bühlmann & Hothorn, 2007). This gives boosting much appeal over other sparsity-inducing  
69 variable selection paradigms, such as the Lasso (Tibshirani, 2011; Efron et al., 2004), Elastic-Net, Support  
70 Vector Machines, Hierarchical Bayesian shrinkage-estimators (Rankin et al., 2016). In this way, component-  
71 wise boosting offers a unified framework to address high-dimensional variable selection, interaction-detection,  
72 and non-linear relationships, while encouraging model parsimony through a prediction-optimized control on  
73 model complexity.

74 The contribution of this study is to develop a special boosting algorithm suitable for capture-recapture  
75 models. This study focuses on the simple two parameter Cormack-Jolly-Seber model (CJS) in order to  
76 introduce and validate the technique (hereafter, CJSboost). However, the ultimate goal is to expand the  
77 technique to a wider class of capture-recapture models. The central challenge of capture-recapture boosting  
78 is the serially dependent nature of observations. Hitherto, the gradient-descent procedure underlying boosting  
79 required independent data points (for estimating negative gradients). The CJSboost approach is to garner  
80 such conditional independence by imputing “two-slice marginal expectations” of pairs of *latent states*  $\mathbf{z}$  (here,  
81 alive or dead). In CJSboost, we alternate between boosting the parameters (conditional on latent states) and  
82 imputing expectations of the latent states (conditional on the parameters). I provide two different techniques  
83 to impute such expectations: i) a special typ of Expectation-Maximization (called CJSboost-EM), and ii)  
84 Monte-Carlo approximation of the marginal distribution of latent states (CJSboost-MC). As I will show,  
85 both algorithms lead to approximately the same estimates. Furthermore, the estimates are qualitatively  
86 very similar to the model-averaged estimates by AICc weighting. The AIC is also motivated by optimal  
87 (asymptotic) predictive performance.

88 The idea of interweaving boosting and an Expectation-step was first suggested in the appendix of Ward  
89 et al. (2009) in their study of presence-only species distribution data. In an HMM context, boosting requires  
90 expectations of the *two-slice marginal* distributions of the latent states pairs, i.e.  $p(z_{t-1}, z_t | \mathbf{y}_{1:T})$ . It is this  
91 insight that paves the way to generalize boosting for a broad class of capture-recapture models.

92 This article proceeds with simulations and an analysis of an European Dipper dataset from Lebreton et al.  
93 (1992), with particular emphasis on comparing estimates from linear and non-linear models (e.g., CART-  
94 like trees), and comparisons to Maximum Likelihood estimation and AICc model-averaging (Burnham &  
95 Anderson, 2004) using Program MARK (White & Burnham, 1999). Simulations will also challenge CJSboost  
96 to perform a model-selection task that is nearly impossible for conventional methods: finding a sparse set of  
97 influential covariates among  $21 \times 21$  different covariates.

98 There are two potential audiences for this paper. First, HMM practitioners will be interested in a  
99 general approach to boosting and HMMs, which opens new possibilities for incorporating regularization, semi-  
100 parametric learners and interaction detection to a vast catalogue of applications. For the second audience of  
101 mark-recapture practitioners, I offer a fresh view of mark-recapture from a *prediction* or *learning* perspective.  
102 For example, we can observe the degree to which regularization and bootstrap-validation suggest simpler  
103 models than those implied by AICc model-averaging. Boosting also offers capture-recapture an alternative  
104 means of inference that is principled and free of p-values and 95% Confidence Intervals (Anderson et al.,  
105 2000; Hoekstra et al., 2014; Morey et al., 2016). Furthermore, this new capture-recapture paradigm can  
106 easily accommodate a range of hot-topics in capture-recapture, such as individual-heterogeneity and spatial  
107 capture-recapture, by leveraging the wide variety of base-learners available in the `mboost` family of R packages  
108 (Bühlmann & Hothorn, 2007; Hothorn et al., 2006; Mayr et al., 2012; Hofner et al., 2012).

## 109 2. Methods

### 110 2.1. Organization

111 The manuscript begins by introducing some basic ideas of statistical learning theory (Section 2.2) and the  
112 Cormack-Jolly-Seber model. Section 2.3 describes two boosting algorithms, CJSboost-EM and CJSboost-  
113 MC, for capture-recapture models. Section 2.4 discusses some important practical considerations about  
114 regularization and base-learners. Section 2.5 describes a simulation to compare the estimates from CJSboost-  
115 EM and CJSboost-MC, as well as AICc model-averaging and MLEs (results in 3.1). Section 2.6 describes  
116 a reanalysis of of dipper dataset using CJSboost-EM and AICc model-averaging (results in 3.2). Section  
117 2.7 uses simulations to assess the performance of CJSboost-EM under a high-dimensional model-selection  
118 problem (results in 3.3). The manuscript finishes with a discussion about how to interpret the results from  
119 CJSboost and poses some new questions (Section 4). A summary is provided in Section 5. For R code and  
120 a tutorial, see the online content at <http://github.com/faraway1nspace/HMMboost/>.

### 121 2.2. Background

#### 122 2.2.1. The Prediction perspective

From a prediction perspective, our goal is to estimate a prediction function  $G$  that maps covariate in-  
formation  $\mathbb{X}$  to our response variable (i.e.,  $G: \mathbb{X} \rightarrow \mathbb{Y}$ ). Our data  $\{y_j, \mathbf{x}_j\}_{j=1}^n$  arises from some unknown  
probability distribution  $P$ . Our optimal prediction function is that which minimizes the *generalization error*:

$$\mathcal{L}(y, G(\mathbf{x})) = \int \ell(y, G(\mathbf{x})) dP(y, \mathbf{x}) \quad (1)$$

123 where  $\ell$  is a *loss* function (it scores how badly we are predicting  $y$  from  $\mathbf{x}$ ) and  $\mathcal{L}$  is the *expected loss*, a.k.a,  
124 the *risk* (our loss integrated over the entire data distribution). Our goal is to minimize the loss on new,  
125 unseen data drawn from the unknowable data distribution  $P$  (Bühlmann & Yu, 2003; Meir & Rätsch, 2003;  
126 Murphy, 2012a). It should be noted that for many disciplines, making good predictions is the primary goal  
127 (e.g., financial forecasting). In mark-recapture, we usually wish to make inference about covariates  $\mathbb{X}$  and

128 their functional relationship ( $G$ ) to the response variable, such as estimating survival from capture histories,  
129 rather than making predictions *per se*. In such cases, the generalization criteria (1) serves as a principled  
130 means of “model parsimony”: our model is as complex as is justified to both explain the observed data  
131 and make good predictions on new data. This is very different from Maximum-Likelihood Estimation (as in  
132 Program MARK) whose estimate  $\hat{G}$  is that which maximizes the likelihood of having seen the observed data  
133  $\mathbf{y}$ . It is, however, similar to AIC selection, which is implicitly motivated by minimizing expected loss (Vrieze,  
134 2012), i.e., optimal predictive performance.

One cannot measure the generalization error (1); instead, we must proceed by minimizing the *empirical risk* measured on our observed data:

$$L(\mathbf{y}, G(\mathbf{X})) = \sum_{j=1}^n \ell(y_j, G(\mathbf{X}_j)) \quad (2)$$

135 Minimizing  $L(\mathbf{y}, G(\mathbf{X}))$  until convergence is easy but will obviously *over-fit* a sample and make bad predic-  
136 tions. However, it can be shown that if we constrain the complexity of our function space (Bühlmann & Yu,  
137 2003; Meir & Rätsch, 2003; Mukherjee et al., 2003) we can pursue a strategy of “regularized risk minimization”  
138 and bound the generalization error. In learning algorithms, this entails at least one regularization parameter  
139 that smooths or constrains the complexity of  $G$ . In other words, we do not seek the estimator that best fits  
140 the data. In boosting, the principal means of regularization is via shrinkage (taking only small steps along the  
141 risk gradient) and early-stopping (*not* running the algorithm until the risk converges). These correspond  
142 to hyperparameters  $\nu$  and  $m$ , respectively, the shrinkage weight and the number of boosting iterations. For  
143 a small  $m$ , the model is strongly constrained and very conservative; as  $m$  gets big, the model becomes more  
144 complex. Likewise,  $\nu \ll 1$  ensures that the influence of any one boosting step is tiny. Practically, one fixes  $\nu$   
145 and finds an optimal  $m$  via cross-validation. Figure 1 shows an example of bootstrap-validation to find an  
146 optimal stopping criteria  $m_{CV}$ , used in the dipper CJS analysis (Section 3.2).

### 147 2.2.2. Motivation for regularization

148 The unregularized boosted model with prediction function  $G^{(m \rightarrow \infty)}$  results in a *fully-saturated model*,  
149 which (depending on the prediction function) is equivalent to the Maximum Likelihood solution (Mayr et al.,  
150 2012). At finite sample sizes and a large candidate-set of covariates, MLEs do not result in good predictions:  
151 they may be unbiased, but they will be wildly sensitive to noise in the data, especially for capture-recapture.  
152 For a regularized model  $G^{(m \ll \infty)}$ , learning algorithms should preferentially select influential covariates and  
153 shrink the coefficients of less-important covariates close to zero. This shrinkage induces a bias (Bühlmann &  
154 Yu, 2003; Bühlmann & Hothorn, 2007), but the predictions are more robust to noisy data (i.e. low-variance;  
155 Murphy, 2012a). In this light, we see the practical similarity between regularization and the more popular  
156 model parsimony strategies in capture-recapture, such as model-selection, model-averaging, and subjective  
157 Bayesian models. Hooten & Hobbs (2015) implore ecologists to unify these techniques under a Bayesian  
158 perspective; for example, the AIC, Lasso/L2Boosting, Ridge-regression can be reformulated in such a way  
159 that they differ according to the priors on the  $\ell_0$ ,  $\ell_1$  and  $\ell_2$ -norm of regression-coefficients, respectively. Even

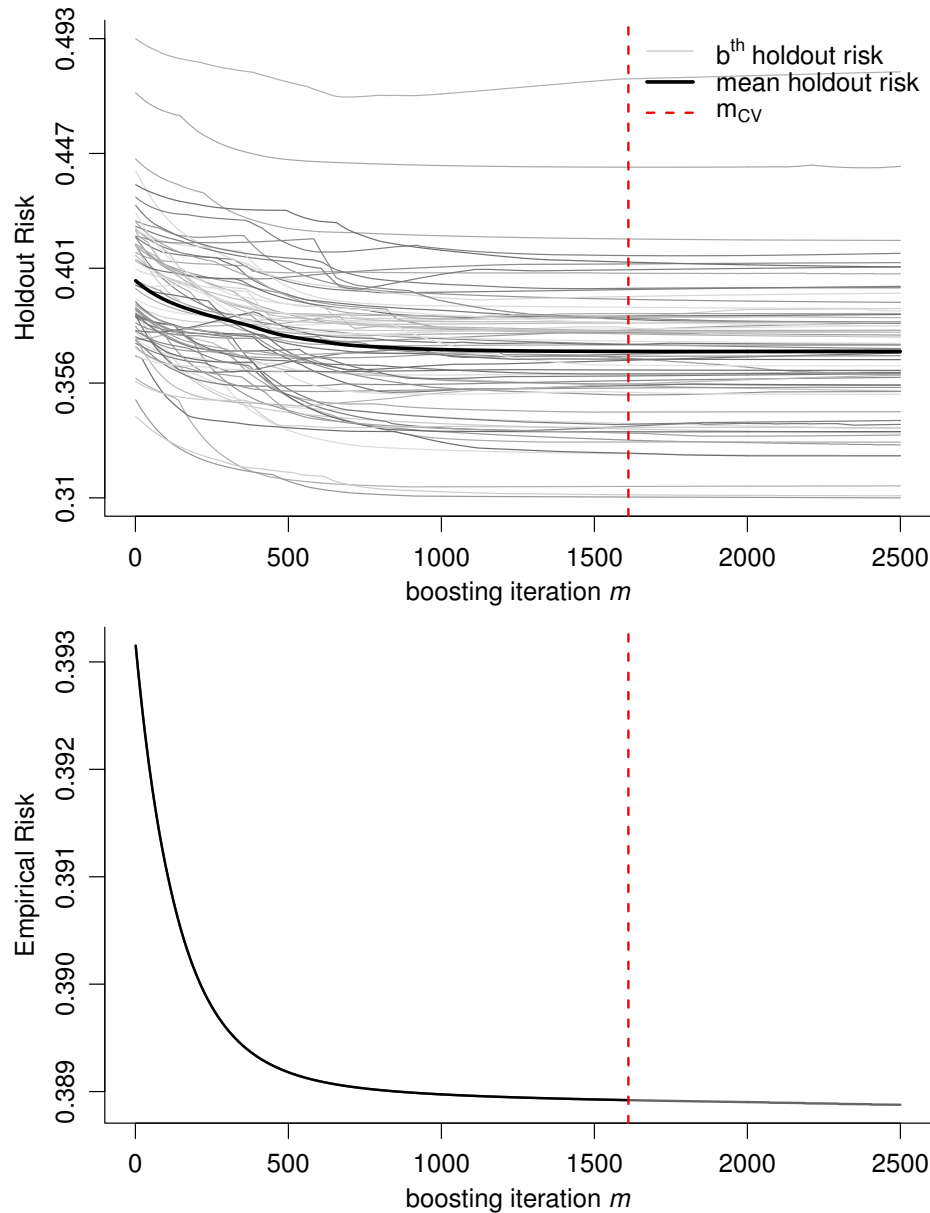

Figure 1: Monitoring the risk minimization (negative CJS log-Likelihood) for the Dipper analysis, using CJSboost-EM with CART-like trees as base-learners. Each boosting iteration  $m$  takes a step towards minimizing the empirical risk and selects a new shrunken base-learner to add to the ensembles. *Top*: Estimating the optimal stopping criteria at  $m_{CV}$  (red dashed line) via bootstrap-validation. Each grey line represents the holdout-risk predicted on a subset of the capture-histories, from a model trained on a bootstrap-sample of capture-histories.  $m_{CV}$  minimizes the mean holdout-risk over all bootstrap runs, an estimate of the *expected loss*. *Bottom*: The empirical risk of the final statistical model using the full dataset; stopping early at  $m_{CV}$ , well before convergence.

160 a simple Bayesian prior can be understood as a type of regularization by shrinking estimates away from  
161 their MLE values and towards the conservative expectations of a prior (a.k.a “natural shrinkage”; Hooten &  
162 Hobbs, 2015).

163 Today, most mark-recapture practitioners are implicitly using a prediction criteria for inference. For  
164 example, the AIC is popular in mark-recapture studies (Johnson & Omland, 2004), thanks in large part

165 to the Frequentist and Information-Theoretic leanings of Program MARK (White & Burnham, 1999). The  
166 AIC is asymptotically prediction-optimal, whose maximum risk is minimal among all potential models, and  
167 has connections with leave-one-out-cross-validation (LOOCV; Stone, 1977; Shao, 1993, 1997; Vrieze, 2012).  
168 However, statisticians consider the AIC to be a bit too permissive, especially if the “true model” is sparse  
169 (Shao, 1993; Burnham & Anderson, 2004; Hooten & Hobbs, 2015). For practical mark-recapture analysis,  
170 the AIC/AICc can favour overly-complex models which can suffer singularities or boundary-value estimates  
171 (like 100% survival or 100% capture probability; Rankin et al., 2016; Hunt et al., 2016). Boosting is also  
172 prediction-optimal (Bühlmann & Yu, 2003), but skirts the issues of singularities and boundary-value estimates  
173 by fitting very simple models, called *base-learners* in a step-wise manner. At finite sample sizes, boosting  
174 should lead to slightly sparser models than the AIC/AICc.

175 In an extreme case of sparsity, when being prediction-optimal is not the chief concern, and one wishes to  
176 instead uncover a “true model” with just a few important covariates, boosting has another desirable prop-  
177 erty. Regularized risk-minimizers (in a univariate setting) can be made model-selection consistent by hard-  
178 thresholding unimportant covariates to zero weight (Bach, 2008; Meinshausen & Bühlmann, 2010; Murphy,  
179 2012c). These sparse solutions may be more interesting for capture-recapture practitioners when inference  
180 about covariates or estimating survival is the chief concern.

### 181 2.2.3. Introduction to boosting

182 Boosting is an iterative method for obtaining a statistical model via gradient descent (Breiman, 1998;  
183 Friedman et al., 2000; Friedman, 2001; Breiman, 1999; Schmid et al., 2010; Robinzonov, 2013). The key  
184 insight is that one can build a strong predictor  $F = G(\mathbf{X})$  by the step-wise addition of many weak *base-*  
185 *learners*,  $b(y, x) \Rightarrow g$ ,  $g(x): x \rightarrow y$  (Schapire, 1990; Kearns & Valiant, 1994). Remarkably, a base-learner  
186 need only have a predictive performance of slightly better than random chance for the entire ensemble to be  
187 strong. The ensemble results in a smooth additive model of adaptive complexity:

$$F^{(m)} = G(\mathbf{X}) = \sum_{k=1}^{m_{\text{stop}}} \nu \cdot g_k^{(m)}(\mathbf{X}_k) \quad (3)$$

188 where each  $g_k$  is a base-learner’s prediction function, shrunk by  $\nu$ . The ensemble is constructed as follows:  
189 i) initialize the prediction vector  $F^{(m=0)}$  at some uniform estimate (like the MLE of an intercept model); ii) fit  
190 base-learners  $b$  to  $\hat{\mathbf{u}}$ , the estimated negative-gradient of the loss function (the residual variation unexplained  
191 by  $F^{(m-1)}$ ),  $b(\hat{\mathbf{u}}, \mathbf{x}) \Rightarrow g$ ; iii) shrink each base-learners’ prediction  $g(\mathbf{x}) = \hat{f}^{(m)}$  by a small fraction  $\nu$ ; iv)  
192 update the overall prediction  $F^{(m)} = F^{(m-1)} + \nu \hat{f}^{(m)}$ ; v) repeat for  $m_{\text{stop}}$  iterations.  $m_{\text{stop}}$  is the key  
193 parameter that governs model complexity (Bühlmann & Yu, 2003; Schmid & Hothorn, 2008a) and must be  
194 tuned by cross-validation or bootstrap-validation. Variable selection can be directly embedded within each  
195 boosting iteration by choosing only one best-fitting base-learner per  $m$  iteration, discriminating among a  
196 large candidate set of base-learners  $\{b(\mathbf{u}, \mathbf{x}_1), b(\mathbf{u}, \mathbf{x}_2), \dots, b(\mathbf{u}, \mathbf{x}_k)\}$ , and where each candidate only includes  
197 a small subset of the covariates  $\mathbf{X}$ . For linear base-learners, this boosting algorithm is generally considered  
198 equivalent to  $\ell_1$  regularization (Efron et al., 2004; Bühlmann & Hothorn, 2007), a.k.a the Lasso.

199 Base-Learners may be simple Least-Squares estimators,  $b_{OLS}$ , in which case an unregularized boosted  
 200 model will estimate regression coefficients that are practically identical to a frequentist GLM. However,  
 201 Bühlmann & Yu (2003) showed that for L2Boosting, good overall predictive performance depends on the fact  
 202 that base-learners are very weak. Therefore, practitioners commonly use highly-constrained base-learners  
 203 such as Penalized Least Squares  $b_{PLS}$ , or recursive-partitioning trees  $b_{trees}$  (a.k.a CART), or low-rank splines  
 204  $b_{spline}$ . Despite their weakness, Bühlmann & Yu note that for a fixed constraint (such as low degrees-of-  
 205 freedom in  $b_{spline}$  or low tree-depth in  $b_{trees}$ ), the overall boosted ensemble will typically have a much greater  
 206 complexity than its constituent base-learners and that this complexity is adaptive.

207 There are many flavours of boosting. CJSboost hails primarily from the component-wise boosting and  
 208 gamboostLSS frameworks (Bühlmann & Yu, 2003; Schmid & Hothorn, 2008b; Schmid et al., 2010; Mayr  
 209 et al., 2012). Here, the prediction vector is now a set  $\mathcal{F} = (F_1, F_2, \dots, F_k)$  of  $k$  components, each representing  
 210 one of the parameters in the likelihood function (e.g.,  $\phi$  and  $p$ ). Each parameter has its own ensemble of base-  
 211 learners. The loss function is the negative log-likelihood of the data-generating model  $\ell_i = -\log p(\mathbf{y}_i | \phi_i, p_i) =$   
 212  $-\log p\left(\mathbf{y}_i \mid \frac{1}{1+e^{-F_\phi}}, \frac{1}{1+e^{-F_p}}\right)$  (see the CJS likelihood 4). Each components' gradient can be estimated from  
 213 the negative partial-derivatives of the loss function with respect to  $F_k$ , i.e.,  $\hat{u}_{k,i} = -\frac{\partial \ell_i}{\partial F_k}$ , conditional on the  
 214 values of the other prediction vectors  $F_{-k}$ . Each  $k$  parameter is updated once per boosting iteration.

#### 215 2.2.4. The Cormack-Jolly-Seber model and Hidden Markov Models

216 The above component-wise boosting framework is not suitable for serially dependent observations in an  
 217 HMM time-series: consider that the negative gradient in traditional boosting must be estimated point-wise  
 218 for each independent data pair  $(y_i, X_i)$ . Instead, the CJS likelihood is evaluated on individuals' entire *capture*  
 219 *histories*  $\mathbf{y}_i = (y_1, y_2, \dots, y_T)^\top$  over  $T$  capture periods:

$$p(\mathbf{y}_i | \phi, p, t_i^0) = \left( \prod_{t > t_i^0}^{t_i^*} \phi_{i,t} p_{i,t}^{y_{i,t}} (1 - p_{i,t})^{1 - y_{i,t}} \right) \chi_i^{(t_i^* + 1)} \quad (4)$$

220 Where  $i$  indexes the  $n$  uniquely identified individuals constituting our dataset;  $t = 1:T$  indexes the  $T$  equally  
 221 spaced capture periods (time);  $y_{i,t} \in [0, 1]$  scores whether individual  $i$  was observed in capture period  $t$ ;  $\phi_{i,t}$  is  
 222 the probability of surviving from capture period  $t-1$  to  $t$  (note the one-time-step difference from the definition  
 223 of  $\phi_t$  used in Program MARK);  $p_{i,t}$  is the capture probability of individual  $i$  in capture period  $t$  (a.k.a, our  
 224 observation error, or the “emission process” in HMM parlance);  $t_i^0$  is the first capture period in which  
 225 individual  $i$  was first observed;  $t_i^*$  is the last period when individual  $i$  was observed. Finally,  $\chi_i^{(t_i^* + 1)}$  is the  
 226 probability of never being seen again after  $t_i^*$  until the end of the study,  $\chi_i^{(t)} = (1 - \phi_{i,t}) + (1 - p_{i,t})\phi_{i,t}\chi_i^{(t+1)}$ ,  
 227 and whose recursive calculation exemplifies the serially dependent nature of the model.  $\mathbf{Y}^{n \times T}$  is the full  
 228 matrix of our capture-histories.

229 Mark-recapture practitioners will be interested to note: i) the model conditions on first-capture  $\{t_i^0\}_{i=1}^n$ ;  
 230 ii) the model can potentially allow for individual heterogeneity in capture probabilities  $p_{t,i}$  (which otherwise  
 231 results in a negative-bias in population abundance estimates; Carothers, 1973; Burnham & Overton, 1978;



Rankin et al., 2016); and iii) certain parameters cannot be separated in Maximum-Likelihood Estimation, such as  $p_T$  and  $\phi_T$ , but this is less of an issue under constrained base-learners and regularization.

In order to boost the CJS model, we need independence of data pairs  $(y_{i,t}, X_{i,t})$ . If we reformulate the capture-recapture system as a HMM, we can garner conditional independence via the concept of latent states  $z_{i,t} \in \{0, 1\}$  to represent {dead, alive}. When  $z_{i,t} = 1$ , then individual  $i$  is alive and available for capture at time  $t$ , and the probability of a capture is simply  $p(y_{i,t} = 1 | z_{i,t} = 1) = p_{i,t}$ . However, if  $z_{i,t} = 0$  then individual  $i$  is dead and unavailable for capture at time  $t$ ; therefore the probability of a capture is zero.

Obviously, one never knows with certainty the latent states of a trailing sequence of zeros  $\mathbf{y}_{t:T} = (0, \dots, 0)^\top$ , but we can utilize well-developed HMM tools to estimate the state-sequence  $\mathbf{z}$  in various ways. In particular, “CJSboost-EM” 2.3.1 utilizes the marginal *expectations* of  $(z_t, z_{t-1})$  in an Expectation-Maximization step. “CJSboost-MC” 2.3.2 utilizes Monte-Carlo integration by drawing random values of  $\mathbf{z}$  from the posterior  $\pi(\mathbf{z} | \mathbf{y}, \phi, p)$ . We can interweave these two methods within a boosting algorithm: both will allow us to estimate point-wise negative gradients for all *complete-data* points  $(\{y_{i,t}, z_{i,t}, z_{i,t-1}\}, X_{i,t})$  and proceed with the gradient descent algorithm.

### 2.3. CJSboost

I will now formally describe the CJSboost variants “CJSboost-EM” and “CJSboost-MC”. In practise, I will show that they lead to approximately the same estimates, but have different computation disadvantages under different scenarios. When the number of discrete states in the HMM process is low (2-3), then the deterministic EM algorithm is significantly faster and less prone to approximation error. For example, in our CJS example, we just have two latent states  $\{0, 1\} := \{\text{dead, alive}\}$  with three legal transitions  $\{1 \rightarrow 1, 1 \rightarrow 0, 0 \rightarrow 0, 0 \rightarrow 1\}$ . However, as the number of discrete states increases, the memory management of all the possible transitions becomes combinatorially expensive. In such scenarios, it is computationally easier to sample  $z$  from its posterior.

#### 2.3.1. CJSboost by Expectation-Maximization

For a CJS model using CJSboost-EM, our target risk is the CJS negative log-likelihood. However, we use the principle of Expectation-Minimization to derive a slightly different loss function and subsequent negative gradients. Our loss is derived from the negative Complete-Data Log-Likelihood (CDL) which assumes we have estimates of the latent state  $z_{i,t}, z_{i,t-1}$ .

$$\begin{aligned}
 -\text{CDL}(y_{i,t}, z_{i,t}, z_{i,t-1} | F_{i,t,\phi}, F_{i,t,p}) &= -\mathbb{1}[z_{i,t-1} = 1, z_{i,t} = 1] \left( \log \left( \frac{1}{1 + e^{-F_{i,t,\phi}}} \right) + y_{i,t} \log \left( \frac{1}{1 + e^{-F_{i,t,p}}} \right) \right) \\
 &\quad + (1 - y_{i,t}) \log \left( \frac{1}{1 + e^{F_{i,t,p}}} \right) \\
 &\quad - \mathbb{1}[z_{i,t-1} = 1, z_{i,t} = 0] \log \left( \frac{1}{1 + e^{F_{i,t,\phi}}} \right) \\
 &\quad - \mathbb{1}[z_{i,t-1} = 0, z_{i,t} = 0]
 \end{aligned} \tag{5}$$

where  $y$  and  $z$  are defined as above in (4) and  $F_{i,t,p}$  and  $F_{i,t,\phi}$  are the prediction vectors for the capture probability component and the survival component, respectively, on the logit scale. In accordance with the principle of EM, we derive a “Q-function” to serve as our new loss, replacing the values of  $(z_{i,t-1}, z_{i,t})$  with their *two-slice marginal* expectations:  $w_t(q, r) := p(z_{t-1} = q, z_t = r | \mathbf{y}, \mathcal{F})$ . Conditional on the prediction vectors  $\mathcal{F}$  and the capture history  $\mathbf{y}$ , the values of the two-slice marginals  $\{w(1, 1), w(1, 0), w(0, 0)\}$  can be easily computed using a standard “forwards-backwards” HMM algorithm (Rabiner, 1989; Murphy, 2012b), as detailed in Appendix A. We can also treat each  $i \times t$  observation as being conditionally independent, resulting in the new index  $j := (i, t)$ . The Q-function is:

$$\begin{aligned} \ell(y_j, \{F_{j,\phi}, F_{j,p}\}) &= -w_j(1, 1) \left( \log \left( \frac{1}{1+e^{-F_{j,\phi}}} \right) + y_j \log \left( \frac{1}{1+e^{-F_{j,p}}} \right) + (1-y_j) \log \left( \frac{1}{1+e^{F_{j,p}}} \right) \right) \\ &\quad - w_j(1, 0) \log \left( \frac{1}{1+e^{F_{j,\phi}}} \right) \\ &\quad - w_j(0, 0) \end{aligned} \quad (6)$$

256 According to the theory of EM, by minimizing the Q-function, we also minimize the target empirical  
257 risk: the negative CJS log-likelihood (4). The advantage of working with the Q-function is that it is easy to  
258 calculate the negative gradients (7) and proceed with the gradient descent.

259 I now describe the CJSboost-EM algorithm.

- 260 1. Set the regularization parameters:  $m_{\text{stop}} \approx 10^2 - 10^3$ ;  $\nu_\phi, \nu_p \approx 10^{-3} - 10^{-1}$ ;
- 261 2. Initialize:  $m = 1$ ;  $\mathcal{F}^{(0)} = \{F_\phi^{(0)} = \hat{\phi}^{\text{MLE}}(\cdot), F_p^{(0)} = \hat{p}^{\text{MLE}}(\cdot)\}$  (i.e., initialize the prediction vectors at the  
262 MLEs of a simple intercept model).
- 263 3. Estimate the two-slice marginal probabilities  $\{w_j(1, 1), w_j(1, 0), w_j(0, 0)\}_{j=1}^J$  for all individuals and  
264 capture-periods, using the forwards-backwards algorithm (see Appendix A.3).
4. Estimate the negative gradients:

$$\begin{aligned} \hat{u}_{j,\phi}^{(m)} &= -\frac{\partial \ell_j}{\partial F_\phi^{(m-1)}} = \frac{w_j(1, 1) - w_j(1, 0)e^{F_{j,\phi}^{(m-1)}}}{(1 + e^{F_{j,\phi}^{(m-1)}})} \\ \hat{u}_{j,p}^{(m)} &= -\frac{\partial \ell_j}{\partial F_p^{(m-1)}} = \frac{w_j(1, 1) \left(1 + e^{F_{j,p}^{(m-1)}}\right) y_j - w_j(1, 1)e^{F_{j,p}^{(m-1)}}}{1 + e^{F_{j,p}^{(m-1)}}} \end{aligned} \quad (7)$$

- 265 5. For each component  $\theta = \{\phi, p\}$ :

- 266 (a) fit  $k$  base-learners independently to the gradients:  $b_k(\hat{\mathbf{u}}_\theta^{(m)}, X_k) \Rightarrow g_k(X_k)$ ;
- 267 (b) each fitted learner makes an estimate of the gradient,  $\hat{f}_k = g_k(X_k)$ ;
- 268 (c) select the best-fitting base-learner  $k^* = \underset{k}{\text{argmin}} (\hat{\mathbf{u}}_\theta^{(m)} - \hat{f}_k)^2$  and append the fitted-learner to the  
269 ensemble  $\mathcal{G}_\theta \leftarrow g_k^*$ ;
- 270 (d) update the prediction vector:  $F_\theta^{(m)} = \nu_\theta \hat{f}_k^* + F_\theta^{(m-1)}$ ;

- 271 6. Estimate the empirical risk on the full data  $L(\mathbf{Y}, \mathcal{F}^{(m)})$ , or estimate the holdout-risk on a test set  
272  $L(\mathbf{Y}_{\text{test}}, \mathcal{F}_{\text{test}}^{(m)})$  s.t.  $\mathcal{F}_{\text{test}}^{(m)} = \{G_\phi^{(m)}(\mathbf{X}_{\text{test}}), G_p^{(m)}(\mathbf{X}_{\text{test}})\}$ .

273 7. Update  $m = m + 1$ .

274 8. Repeat steps 3 to 7 until  $m = m_{stop}$ .

275 The outputs of the algorithm are the fit vectors  $\mathcal{F}$  and the ensemble of fitted base-learners  $\mathcal{G}_\phi$  and  $\mathcal{G}_p$ . The  
 276 estimate of survival for individual  $i$  at time  $t$  can be retrieved  $j := (i, t)$ ;  $\phi_j = \text{logit}^{-1}(F_j)$ , and likewise for  
 277 capture probability. For predicting  $\phi$  and  $p$  on new covariate data  $\mathbf{X}$ , we merely process the data through  
 278 the ensemble of fitted base-learners and shrink by  $\nu$ , i.e.,  $F_\theta^{\text{pred}} = G_\theta(\mathbf{X}) = \nu_\theta \sum_{g_k \in \mathcal{G}_\theta} g_k(\mathbf{X})$ .

279 The three regularization parameters  $m_{stop}$ ,  $\nu_\phi$ ,  $\nu_p$  must be tuned by minimizing the holdout-risk averaged  
 280 over many out-of-sample test sets, i.e., our estimate of the expected loss (see 2.4).

### 281 2.3.2. CJSboost by Monte-Carlo approximation

282 A second strategy to garner conditional independence of data-points  $(y_j, \mathbf{x}_j)$  and estimate the negative  
 283 gradients is to integrate over the latent state distributions  $\pi(\mathbf{z}_i | \mathbf{y}_i, \mathcal{F}_i)$  with a large sample drawn from the  
 284 posterior. A fast and simple “forward-filtering and backward-sampling” algorithm is used (Rabiner, 1989;  
 285 Murphy, 2012b), detailed in Appendix A.4. Within each boosting iteration  $m$ , we sample  $S$  sequences  
 286 of  $\mathbf{z}_i$ . Per  $s$  sequence, we estimate a separate negative-gradient, and fit base-learners to it. After fitting  
 287 all  $S$  samples, we update the prediction vectors with the best-fitting base-learners from each sequence,  
 288  $F_\theta^{(m+1)} = F_\theta^{(m)} + \nu_\theta \sum_s \hat{f}^{(s)}$ . Over  $S \times m$  draws, this is approximately equivalent to the EM algorithm. For  
 289 comparable results to CJSboost-EM, the shrinkage parameters  $\nu_{MC}$  should be set equal to  $\frac{1}{S} \nu_{EM}$ , i.e., the  
 290 contribution of any one sequence  $\mathbf{z}^{(s)}$  is small.

291 I now describe the CJSboost-MC algorithm:

292 1. Set parameters  $S$ ,  $m_{stop}$ ,  $\nu_\phi$ , and  $\nu_p$ .

293 2. Initialize  $m = 1$  and  $\mathcal{F}^{(0)}$ .

294 3. For  $s = 1 : S$ , do:

295 (a) sample latent state sequence  $\mathbf{z}_i^{(s)} \sim \pi(\mathbf{z} | \mathbf{y}_i, \mathcal{F}_i)$  (see Appendix A.4);

(b) estimate the negative gradients, conditional on  $\mathbf{z}_i^{(s)}$ :

$$\hat{u}_{i,t,\phi}^{(m,s)} = -\frac{\partial \ell_{i,t}}{\partial F_\phi^{(m-1)}} = \frac{\mathbb{1}[z_{i,t-1}^{(s)} = 1, z_{i,t}^{(s)} = 1] - \mathbb{1}[z_{i,t-1}^{(s)} = 1, z_{i,t}^{(s)} = 0] \cdot e^{F_{i,t,\phi}^{(m-1)}}}{1 + e^{F_{i,t,\phi}^{(m-1)}}}$$

$$\hat{u}_{i,t,p}^{(m,s)} = -\frac{\partial \ell_{i,t}}{\partial F_p^{(m-1)}} = \frac{\mathbb{1}[z_{i,t-1}^{(s)} = 1, z_{i,t}^{(s)} = 1] \left( (1 + e^{F_{i,t,p}^{(m-1)}}) y_{i,t} - e^{F_{i,t,p}^{(m-1)}} \right)}{1 + e^{F_{i,t,p}^{(m-1)}}}$$

296 (c) for each component  $\theta = \{\phi, p\}$ :

297 i. fit  $k$  base-learners independently to the gradients:  $b_k(\hat{\mathbf{u}}_\theta^{(m,s)}, X_k) \Rightarrow g_k^{(s)}(X_k)$ .

298 ii. each fitted learner makes an estimate of the gradient,  $\hat{f}_k^{(s)} = g_k^{(s)}(X_k)$

299 iii. select the best-fitting base-learner  $k^{(s)*} = \underset{k}{\text{argmin}} (\hat{\mathbf{u}}_\theta^{(m,s)} - \hat{f}_k^{(s)})^2$  and append the fitted-learner  
 300 to the ensemble  $\mathcal{G}_\theta \leftarrow g_k^{(s)*}$ .

301 4. For each  $\theta = \{\phi, p\}$ : update the fit vectors, overall  $s$ :  $F_\theta^{(m)} = F_\theta^{(m-1)} + \nu_\theta \sum_s \hat{f}^{(s)}$ .

- 302 5. Estimate the empirical risk on the training data  $L(\mathbf{Y}, \mathcal{F}^{(m)})$ , or on a holdout test set  $L(\mathbf{Y}_{\text{test}}, \mathcal{F}_{\text{test}}^{(m)})$ .
- 303 6.  $m = m + 1$
- 304 7. Repeat steps 3 to 6 until  $m = m_{\text{stop}}$ .

305 Just as in the CJSboost-EM algorithm, we must tune  $\nu$  and  $m_{\text{stop}}$  through cross-validation or bootstrap-  
306 validation (Section 2.4).

307 Notice that although the two algorithms have different specific negative-gradients and loss functions, the  
308 empirical risk is always the negative log-likelihood of the CJS model.

#### 309 2.4. Hyperparameters

310 In component-wise boosting, the three most important regularization parameters are  $m_{\text{stop}}$ ,  $\nu_\phi$ ,  $\nu_p$ . These  
311 must be tuned by some form of holdout-validation. As per Schmid et al. (2013), I suggest sampling with  
312 replacement (bootstrapping) individuals' capture histories between 50 to 100 times, training a new model on  
313 each bootstrap sample. On average, each bootstrap leaves 36.5% of the capture-histories unused in the model  
314 fitting, which can then be used to estimate a holdout-risk. Averaged over all bootstraps, this is an estimate of  
315 the generalization error. Bootstrap-validation is preferable to k-fold or leave-one-out cross-validation because  
316 it is most similar to the multiple resampling/subsampling schemes of Shao (Monte-Carlo CV and Delete-d CV;  
317 1993, 1997) which are model-selection consistent under a wider variety of conditions (e.g., sparsity, tapering).  
318 Finally, the K-bootstrap can also give us an estimate of posterior inclusion probabilities via stability-selection  
319 (Meinshausen & Bühlmann, 2010; Murphy, 2012c), which I use in section 2.7.

320 Because we can monitor the trajectory of the holdout-risk during each boosting iteration, we only need to  
321 perform one round of K-bootstrap-validation to find the optimal  $m$ . See Figure 1 for an example of monitoring  
322 the holdout-risk and estimating  $m_{\text{cv}}$ . Estimating optimal values of  $\nu_\phi$  and  $\nu_p$  is more complicated because they  
323 are continuous; in practise we must discretize the set of plausible combinations, e.g.,  $(10^{-4}, 10^{-3}, 10^{-2}, 10^{-1}) \times$   
324  $(10^{-4}, 10^{-3}, 10^{-2}, 10^{-1})$ . Each combination requires a separate bootstrap-validation exercise. This is the  
325 most expensive step of CJSboost. See Appendix B for a suggestion on how to perform this task with only  
326 7-10 K-bootstrap-validation runs.

327 The reader should note that other multivariate boosting techniques (such as gamboostLSS; Schmid et al.,  
328 2013; Mayr et al., 2012) instead have a single fixed  $\nu$  for all parameters, and seek to optimize  $m_\theta$  per parameter  
329  $\theta$ . This is inversely related to what I propose: optimizing a global  $m_{\text{stop}}$  for both parameters, while optimizing  
330 the *ratio* of  $\nu_{\theta_1}$  to  $\nu_{\theta_2}$ . The two methods are equivalent in their outcome. In other words, making  $\nu_\theta$  smaller  
331 for component  $\theta$  is the same as decreasing  $m_\theta$  for fixed  $\nu$ , and *vice versa*. More importantly, other authors  
332 have claimed that there is little benefit in optimizing  $m$  and  $\nu$  for each component (Schmid et al., 2013).  
333 This is untrue for CJSboost, where the optimal estimate of  $\nu_\phi$  may be several orders of magnitude different  
334 than the optimal  $\nu_p$ .

335 There are theoretically many other hyperparameters, such as the base-learner parameters which control  
336 flexibility, e.g. the effective degrees-of-freedom of a spline, or the maximum tree-depth of a conditional  
337 inference tree (Hothorn et al., 2006). However, Bühlmann & Yu (2003) and Schmid & Hothorn (2008a)

338 show that these can be safely fixed and one should instead focus on  $m_{\text{stop}}$ . A more important consideration  
339 is the *relative* flexibility of competing base-learners: multi-covariate learners and unpenalized learners have  
340 a greater freedom to (over)fit the residual variation and will be preferentially selected in the algorithm.  
341 Therefore, one should use penalties to enforce a similar effective degrees-of-freedom among all base-learners,  
342 as well as decompose higher-order interactions and non-linear curves into their constituent components. For  
343 example, if one wishes to learn about the role of covariates  $x_1$  and  $x_2$  and the possibility of an interaction  
344 between  $x_1 \times x_2$ , then one must add three PLS base-learners of equal effective-*df*: two for the main-effects  
345 and a separate base-learner for their interaction. Readers should refer to the practise of “centring” in Kneib  
346 et al. (2009) and Hofner et al. (2012).

### 347 2.5. Simulation 1: MC vs EM vs AICc vs MLE

348 The goals of this simulation were to compare estimates of survival and capture probabilities among  
349 the two boosting algorithms (CJSboost-EM and CJSboost-MC) and benchmark them against MLEs and  
350 AICc model-averaging. The simulated dataset was inspired by the European Dipper dataset from (Lebreton  
351 et al., 1992). The simulated dataset included  $T = 10$  primary periods, and  $n = 300$  individuals in two  
352 groups (male and female). Individuals’ first-capture periods ( $t_i^0$ ) were random. The true processes were  
353 smoothly time-varying effects plus an individual covariate (sex-effect). The true data-generating processes  
354 were:  $p(t, \text{sex}) = \text{logit}^{-1} \left( 0.5 + t \frac{\sin(t)}{17} \right) - 10 \cdot \mathbb{1}[\text{sex} = 1]$  and  $\phi(t, \text{sex}) = 0.91 - 0.01 \cdot t - 0.05 \cdot \mathbb{1}[t = 5, 6] +$   
355  $0.05 \cdot \mathbb{1}[t = 9, 10] - 0.05 \cdot \mathbb{1}[\text{sex} = 1]$ . Figure 3 graphs the true processes.

356 Figure 2A shows all combinations of  $p$  and  $\phi$  parametrizations, which has 64 possible fixed-effect models  
357 for estimation by Maximum Likelihood and AICc model-averaging. The true model is best represented as  
358  $\phi(t, \text{sex})p(t, \text{sex})$ . *Flood* is a dummy categorical variable that groups the captures periods  $\{4, 5, 6\}$  (corre-  
359 sponding to a trough in either process): it simulates an analyst’s hypothesis that high flood years (in periods  
360 4,5,6) may influence dipper survival and capture probability. The MLE and AICc model-averaging analyses  
361 were conducted with Program MARK (White & Burnham, 1999) and RMark (Laake, 2013).

362 For the boosting analyses, four techniques were compared: i) linear-model CJSboost-EM (using OLS  
363 and PLS base-learners); ii) non-linear CJSboost-EM (using a CART-like base-learner called “conditional-  
364 inference trees”; Hothorn et al., 2006); iii) linear-model CJSboost-MC; and iv) non-linear CJSboost-MC.  
365 For the linear-models, the OLS and PLS base-learners included all base-learners listed in Figure 2B. See  
366 the `mboost` R package (Bühlmann & Hothorn, 2007; Hofner et al., 2012). Variable selection occurs as a  
367 consequence of the internal competition among base-learners to fit the gradient, per boosting iteration. The  
368 effective degrees-of-freedom of each base-learner were constrained with ridge penalties, as per Section 2.4.  
369 The non-linear CJSboost models had just one CART-like base-learner per  $\phi$  and  $p$ . Variable-selection and  
370 interactions are implemented internally to the `ctree` algorithm, much like a black-box.

371 All 4 models used 70-times bootstrap-validation to estimate optimal values of  $m_{\text{stop}}$ ,  $\nu_\phi$  and  $\nu_p$ , as per  
372 section 2.4.

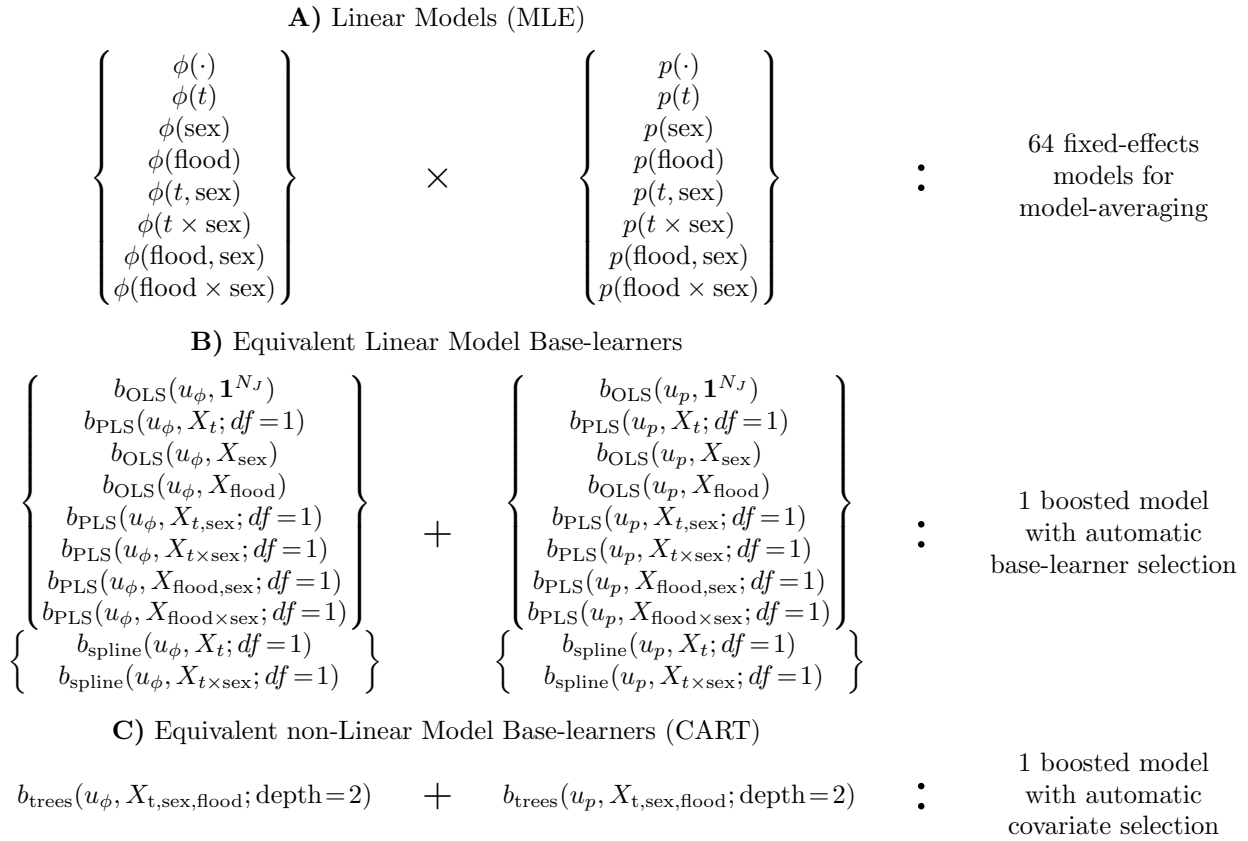

Figure 2: Different notation for multimodel inference of a Cormack-Jolly-Seber model, comparing fixed-effects model-averaging and boosting. **A)** Each fixed-effect model includes one term for  $\phi$  (*left*) and one for  $p$  (*right*).  $\theta(\cdot)$  is an intercept model;  $\theta(t)$  has different coefficients per  $T$  capture periods (with appropriate constraints on  $t=T$ );  $\theta(a, b)$  is a linear combination of covariate  $a$  and  $b$  on the logit scale;  $\theta(a \times b)$  is an interaction effect between  $a$  and  $b$  on the logit scale. **B)** Equivalent linear base-learners (Ordinary and Penalized Least Squares from `mboost`; Bühlmann & Hothorn, 2007) with penalties to constrain their effective- $df$  (ridge penalty). All terms are available in one model; selection of base-learners is by component-wise boosting. **C)** Non-linear CJS model with CART-like trees, allowing complex interactions. Selection of covariates is by the `ctree` algorithm (Hothorn et al., 2006).

### 373 2.6. Analysis: dipper example

374 Using CJSboost-EM, I reanalyzed the European Dipper dataset from (Lebreton et al., 1992). I compared  
 375 the results to the MLEs of the fully-saturated model ( $\phi(t \times \text{sex})p(t \times \text{sex})$ ) as well as to AICc model-averaged  
 376 estimates. The dataset has 294 individuals in  $T = 7$  capture periods. Covariates included time, sex, and  
 377 flood, similar to Section 2.5. The model-building framework was the same as in Figure 2. A 70-times  
 378 bootstrap-validation was used for optimizing  $m_{\text{stop}}$ ,  $\nu_\phi$  and  $\nu_p$ .

379 Interested readers can repeat this analysis using the online tutorial at [http://github.com/faraway1nspac/](http://github.com/faraway1nspac/HMMboost/)  
 380 `HMMboost/`.

### 381 2.7. Simulation 2: high-dimensional example

382 The final simulation addressed the issue of high-dimensionality and the ability of CJSboost (EM) to find  
 383 a sparse set of important covariates out of many spurious covariates. This is a variant of the “small n big p”

384 problem often studied in machine learning. However, this challenge is extraordinarily difficult for capture-  
 385 recapture analysis, because one must consider all combinations of covariates for different parameters ( $\phi, p$ ).  
 386 In this section, I simulated 21 multi-colinear, individual-level covariates (18 continuous, three discretized)  
 387 drawn from a multivariate Gaussian with marginal variances of 1. The general model can be represented as:

$$\text{logit}(\theta_{i,t}) = \beta_{\theta,0} + \underbrace{\sum_{k=1}^{21} X_{i,k} \beta_{\theta,k}}_{\text{individual effects}} + \underbrace{\sum_{\tau=2}^T \beta_{\theta,\tau} \mathbb{1}[\tau=t]}_{\text{capture period effect}}$$

388 The intercepts were drawn randomly from  $\beta_{p,0} \sim \text{U}(0.4, 0.6)$  and  $\beta_{\phi,0} \sim \text{U}(0.55, 0.8)$ . The true models  
 389 were deliberately *sparse*, such that only three covariates' coefficients ( $\beta_{\theta}^*$ ) were non-zero. For continuous  
 390 variables,  $\beta_{\theta}^*$  had a norm of 1 (on the logit scale), while the categorical-variables had norms of 3, resulting  
 391 in individual marginal effects spanning 0.8–0.9 probability-units. Time-as-a-categorical-variable was also  
 392 included as a possible influential covariate. The number of individuals varied randomly from  $n = 200:300$ , in  
 393  $T = 10$  capture periods. The simulation was repeated 30 times, each time with new covariates and coefficients.

394 Such a model-averaging exercise cannot be performed in MARK, because there are more than 4 trillion  
 395 different fixed-effects models (excluding two-way interactions or higher). Furthermore, the AIC is known to  
 396 do poorly when the simulated true model is sparse by design (Burnham & Anderson, 2004).

397 For each simulated dataset, the boosting analyses used 23 different PLS base-learners ( $df = 2$ ) for all  
 398 continuous and categorical covariates, and included capture-period  $t$  as a categorical variable (a.k.a, the  $\theta(t)$   
 399 model). A 70-times bootstrap-validation was performed to optimize  $m_{\text{stop}}$ ,  $\nu_p$ , and  $\nu_{\phi}$ . After optimization,  
 400 the performance of the fitted models were assessed by calculating 2 point-wise statistics between the true  
 401 (simulated) processes and the estimates of  $\text{logit}(\phi)$  and  $\text{logit}(p)$ : i) Pearson correlation  $\rho(F_{\theta}^{(\text{true})}, \hat{F}_{\theta})$ ; and ii)  
 402 the slope between  $s(F_{\theta}^{(\text{true})}, \hat{F}_{\theta})$  from a simple linear regression, whereby  $s = 1$  suggests that the estimates  
 403 are unbiased.  $\hat{\rho}_{\theta}$  is a measure of the precision of the linear relationship between the true and fitted values,  
 404 while  $\hat{s}_{\theta}$  can be likened to angular bias.

405 An extra topic explored in the online tutorial, but not in this paper, was the performance of CART-like  
 406 trees (see <http://github.com/faraway1nspac/HMMboost/>).

407 In addition to studying the precision and bias of estimates, I also demonstrate the usefulness of inclusion  
 408 probabilities (the probability that a covariate is selected in the model) to infer the importance of covariates. I  
 409 used the technique of stability selection from Meinshausen & Bühlmann (2010), integrated within the 70-times  
 410 bootstrap-validation. Stability selection probabilities  $\hat{S}$  are estimated by scoring whether a  $k^{\text{th}}$  covariate  $X_k$   
 411 is selected in a  $b$  bootstrap before  $m$  iterations,  $\hat{S}_{\theta,k}^{(m)} = \frac{1}{70} \sum_{b=1}^{70} \mathbb{1}[X_k \in \mathcal{G}_{\theta}^{(m,b)}]$ ;  $\hat{S}_{\theta,k}^{(m)}$  is evaluated per  $m$ , per  
 412 covariate  $X_k$  and per parameter  $\theta \in \{\phi, p\}$ . The average over all (reasonable) regularization hyperparameters  
 413 yields a Frequentist approximation to posterior inclusions probabilities,  $\pi(i_{\theta,k}|\mathcal{D}) \approx \frac{1}{m_{\text{max}}} \sum_{m=1}^{m_{\text{max}}} S_{\theta,k}^{(m)}$  (David  
 414 Draper, 2010; Murphy, 2012c). Ideally, influential covariates should have very high inclusion probabilities  
 415 ( $\gg 0.5$ , and perhaps close to 1). Such posterior probabilities are an important means of inference about the  
 416 covariates, and are more intuitive than other familiar tools for inference, like 95%CI (Hoekstra et al., 2014;

417 Morey et al., 2016). Also, the *stability paths* (Figure 8) can be a valuable graphical tool for interpreting the  
418 importance of covariates (Meinshausen & Bühlmann, 2010).

419 Stability selection can also serve in a second-stage of “hard-thresholding” to find a sparse set of truly  
420 influential covariates (Bach, 2008; Meinshausen & Bühlmann, 2010). One picks an inclusion probability  
421 threshold between 0.5–0.99, and discards non-influential covariates below this threshold. One can proceed  
422 to “debias” the coefficients by running a final boosting model using only the selected covariates (Murphy,  
423 2012c) and setting  $m \rightarrow \infty$ . Choosing an appropriate threshold is a classic trade-off between Type I errors  
424 and Power: a high threshold  $\approx 1$  should correctly reject the non-influential covariates (low False Discovery  
425 Rate) but may wrongly reject some of the truly influential covariates (high False Rejection Rate); a low  
426 threshold  $< 0.5$  will result in a higher False Discovery Rate but low False Rejection Rate. Ideally, there  
427 should be a wide range of thresholds between 0.5-1 where both the FDR and FRR are close to zero.

428 When the FDR and FRR are zero, a procedure is called “model-selection consistent”: it can correctly  
429 shrink the coefficients of non-influential covariates to zero. It is also an “oracle” if it can accurately estimate  
430 coefficients as if the true model was known in advance (Zou, 2006). The Lasso, Ridge-regression, and Boosting  
431 do *not* have these properties (Zou, 2006; Bach, 2008; Bühlmann & Hothorn, 2010): there is a pernicious trade-  
432 off between predictive-performance and model selection consistency (Zou, 2006; Meinshausen & Bühlmann,  
433 2006; Murphy, 2012c) which has to do with one’s values (Vrieze, 2012). The AIC is also not model-selection  
434 consistent (Shao, 1997; Vrieze, 2012). Instead, the AIC and Boosting are motivated by good prediction  
435 performance and minimizing the expected loss, rather than the belief in a sparse true model. Many authors  
436 laud this latter perspective, and declare sparsity to be a purely human construct that is irrelevant to natural  
437 phenomena (Burnham & Anderson, 2004; Vrieze, 2012). Philosophical notions aside, there may be a strong  
438 practical imperative in capture-recapture to favour sparser solutions than what AIC or boosting can provide,  
439 as we demonstrate with the stability paths. Towards this goal, stability selection and inclusion probabilities  
440 can transform an  $\ell_1$  regularizer into a model-selection consistent procedure (Bach, 2008; Meinshausen &  
441 Bühlmann, 2010). Further debiasing can give it oracle properties. Such a multi-stage procedure is no longer  
442 strictly about prediction; rather, it considers regularization as an intermediary step towards an ultimate goal  
443 to recover a true sparse model.

444 One caveat to using stability selection for CJSboost is that base-learners must have equal flexibility/degrees-  
445 of-freedom; otherwise, the more complex base-learners (and their constituent covariates) will have a greater  
446 probability of being selected (Kneib et al., 2009). See Section 2.4.

447 A final note on debiasing and convexity of the loss function: after thresholding, the final model may not  
448 have a unique MLE, such as as the  $\phi(t)p(t)$  model. In such cases, one must impose constraints (such as  
449  $\phi_T = \phi_T$ ) before attempting to debias the results and run the gradient descent until convergence  $m \rightarrow \infty$ .  
450 Regularized CJSboosting does not have this problem because of early-stopping and model-selection.



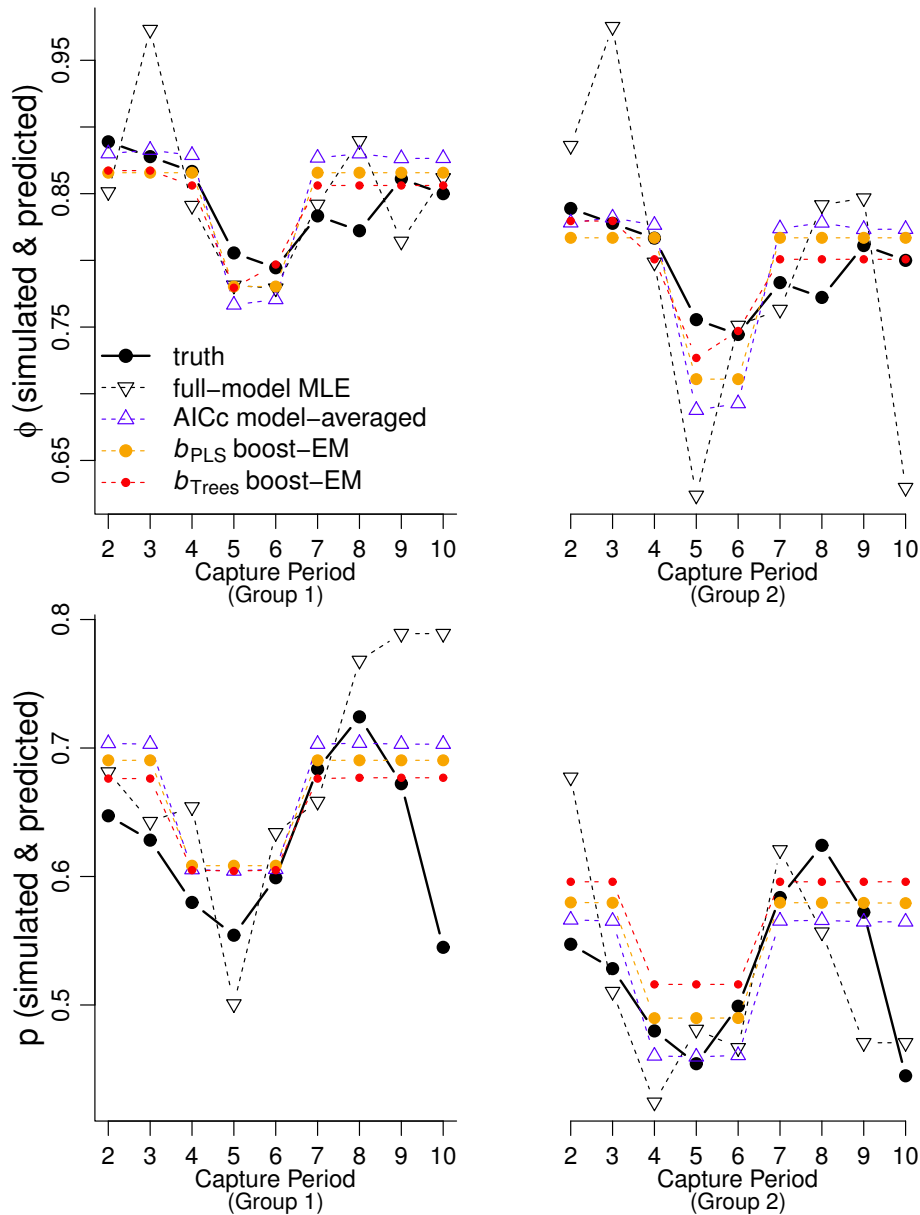

Figure 3: Simulation 1, demonstrating the CJSboost estimates from the Expectation-Maximization technique. A comparison of capture probability estimates  $\hat{p}(t \times \text{sex})$  and survival estimates  $\hat{\phi}(t \times \text{sex})$  from models composed of linear base-learners (OLS and PLS; in orange) and non-linear base-learners (CART-like trees; in red), as well AICc model-averaging (blue) and MLE (dashed black).

### 451 3. Results

#### 452 3.1. Simulation 1: EM vs MC vs AICc vs MLE

453 Figure 3 compares the estimates from CJSboost-EM versus AICc model-averaging and MLEs from the  
 454 full-model  $\phi(t \times \text{sex})p(t \times \text{sex})$ , as well as the true processes. Figure 4 does the same for the CJSboost-MC.  
 455 The results can be summarized as follows:

456 i) The Expectation-Maximization algorithm and the Monte-Carlo algorithm yielded approximately the

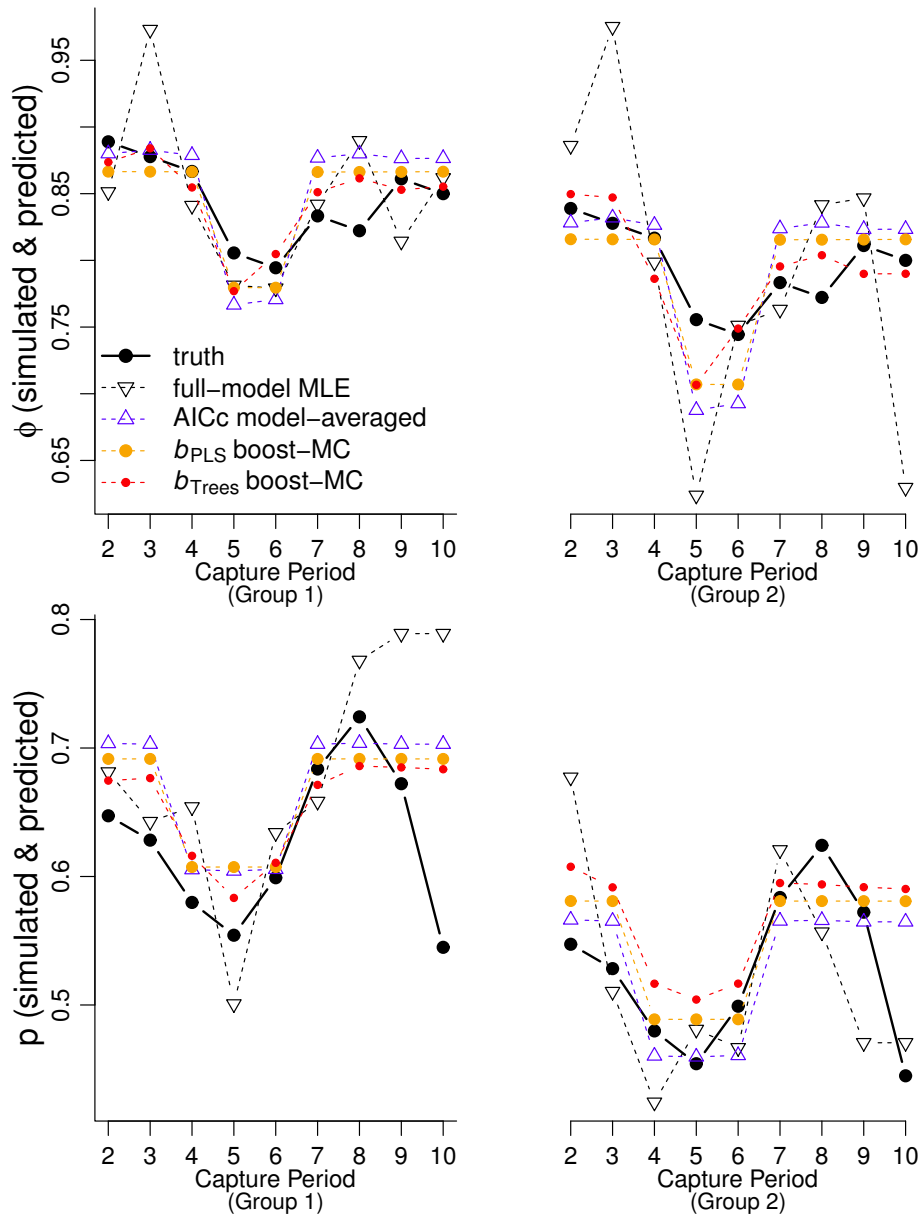

Figure 4: Simulation 1, demonstrating CJSboost estimates from the Monte-Carlo approximation technique. A comparison of capture probability estimates  $\hat{p}(t \times \text{sex})$  and survival estimates  $\hat{\phi}(t \times \text{sex})$  from models composed of linear base-learners (OLS and PLS; in orange) and non-linear base-learners (CART-like trees; in red), as well AICc model-averaging (blue) and MLE (dashed black).

- 457 same estimates for the linear models ( $b_{\text{PLS}}$ ), but slightly different results for the non-linear CART-like  
 458 base-learners ( $b_{\text{Trees}}$ ).
- 459 ii) None of the four methods (MLE, AICc,  $b_{\text{PLS}}$ -boost or  $b_{\text{Trees}}$ -boost) did a convincing job of approximating  
 460 the true underlying processes (for both  $\phi$  and  $p$ ), although each model did uncover some aspect of the  
 461 true processes.
- 462 iii) The similarities between the three predictive methods (AIC,  $b_{\text{PLS}}$ -boost,  $b_{\text{Trees}}$ -boost) were thus:  
 463 (a) all three methods showed the same pattern for both for  $\phi$  and  $p$ : low values during the flood periods

- 464  $(t=4, 5, 6)$ , and a moderate sex effect (group 1 had higher values than group 2);
- 465 (b) the  $b_{\text{PLS}}$ -boost model was most similar to AICc model-averaging;
- 466 (c) the estimates from both boosted models were *shrunk to the mean* relative to model-averaged esti-  
467 mates; i.e., high model-averaged estimates were generally greater than the boosted estimates, and  
468 low model-averaged estimates were generally lower than the boosted estimates;
- 469 (d) the non-linear  $b_{\text{trees}}$  estimates showed more shrinkage to the mean than the linear  $b_{\text{PLS}}$  estimates;
- 470 iv) The MLEs of the full-model  $\hat{\phi}(t \times \text{sex})\hat{p}(t \times \text{sex})$  showed the most extremes values.

### 471 3.2. Results: Dipper example

472 This section shows the reanalysis of the European Dipper dataset from Lebreton et al. (1992). Figure  
473 1 shows an example of the gradient descent of the empirical risk and the holdout-risk from the 70-times  
474 bootstrap-validation used to estimate the optimal  $m_{\text{stop}}$ . Comparisons were between the linear  $b_{\text{PLS}}$ -boost-  
475 EM model (Figure 5) and the non-linear  $b_{\text{Trees}}$ -boost-EM model (Figure 6), as well as AICc model-averaging  
476 and MLEs from the full-model  $\phi(t \times \text{sex})p(t \times \text{sex})$ . Both Figures also show the “regularization pathway” of  
477 their respective boosted model: the movement of the estimates from their initial uniform intercept model (at  
478  $m=0$ ) to their final values at  $m=m_{\text{CV}}$ , stratified by the percentage of the total reduction in the empirical  
479 risk. The results can be summarized thus:

- 480 i) For both survival  $\phi$  and capture probability  $p$ , all three predictive methods (AICc,  $b_{\text{PLS}}$ -boost or  $b_{\text{trees}}$ -  
481 boost) were much more similar to each other than to the MLEs from the full-model.
- 482 ii) For survival, all three predictive methods yielded the same estimates: a survival probability of 0.48-0.5  
483 during the flood years ( $t=3, 4$ ) and no sex-effect.
- 484 iii) For capture probability, the model-average estimates suggested a slight sex effect of about 1.5 probability  
485 units, whereas both boosted models shrunk the capture-probability to a constant; in contrast, the MLEs  
486 varied wildly.
- 487 iv) Regarding the regularization pathways, the linear  $b_{\text{PLS}}$ -boosted estimates converged very quickly (within  
488 25% of the gradient decent) to their final estimates; whereas the movement of the non-linear  $b_{\text{Trees}}$ -  
489 boosted estimates moved much more gradually.

### 490 3.3. Simulation 2: high-dimensional example

491 Over the 30 simulations, the Pearson correlation between the true and estimated survival had the following  
492 descriptive statistics: mean of 0.979, minimum of 0.955,  $Q_{0.05}$  of 0.959, and a maximum of 0.997. For capture  
493 probability, the same statistics were: 0.961, 0.708, 0.911 and 0.998. The slope statistic, a measure of bias  
494 between estimated and true survival, had the following statistics: mean of 0.778, minimum of 0.618,  $Q_{0.05}$   
495 of 0.647, and maximum of 1.018. For capture probabilities, these slope statistics were: 0.782, 0.404, 0.542,  
496 0.962. Figure 7 shows the results of one example simulation to demonstrate the high-precision and slight-bias  
497 that is characteristic of boosting algorithms and other  $\ell_1$  regularizers.

498 Regarding the stability selection results, Figure 8 shows an example of the stability paths over  $m$  (for the  
499 same simulations shown in Figure 7). Readers can view an online animated GIF which shows the stability

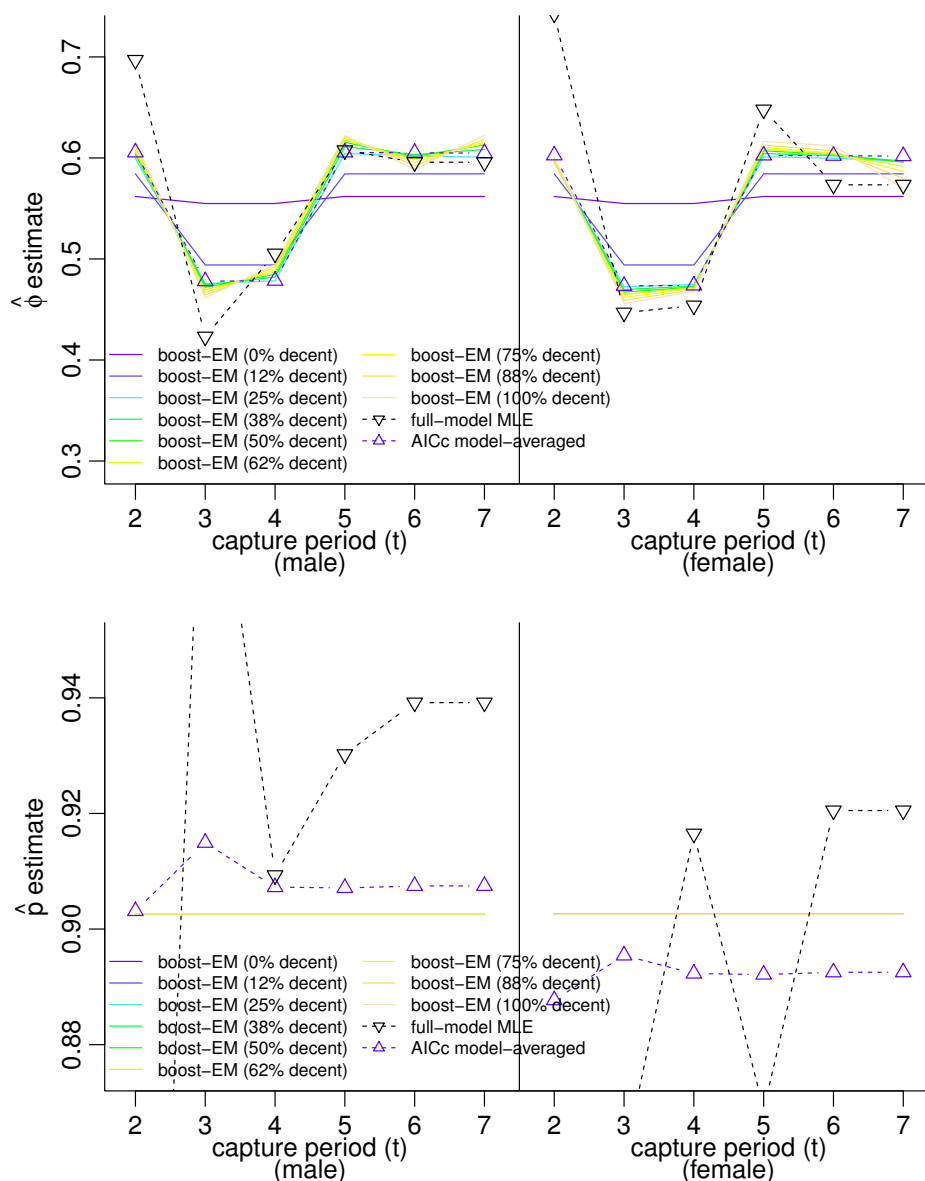

Figure 5: Dipper analysis of survival  $\phi$  and capture probability  $p$  by CJSboost-EM using least-squares base-learners, plus comparison with AICc model-averaging and MLE ( $\hat{\phi}(t \times \text{sex})\hat{p}(t \times \text{sex})$ ). The regularization pathway of the estimates is visualized with the spectrum-coloured lines, starting at the intercept-only model (0% decent) and growing more complex as the gradient descent algorithm proceeds. The final estimates are achieved at 100% of the descent, when the boosting iteration  $m_{CV}$  is reached.

500 paths for all 30 simulations, at <http://github.com/farawayinspace/HMMboost/> and in the Supplementary  
 501 Material. The results can be summarized as:

- 502 i) The stability paths of the truly influential covariates (in red, Figure 8) were visually very different from  
 503 the rest of the non-influential covariates (grey). In particular, the truly influential covariates reached  
 504 high stability selection probabilities  $S$  for small values of  $m$ . For  $\phi$ , they reach  $S_{\phi}^{(m_{CV})} = 1$  by the optimal  
 505  $m_{CV}$  in all simulations; while for  $p$ , 94.6% of the covariates reached  $S_p^{(m_{CV})} = 1$  by  $m_{CV}$ . On average,

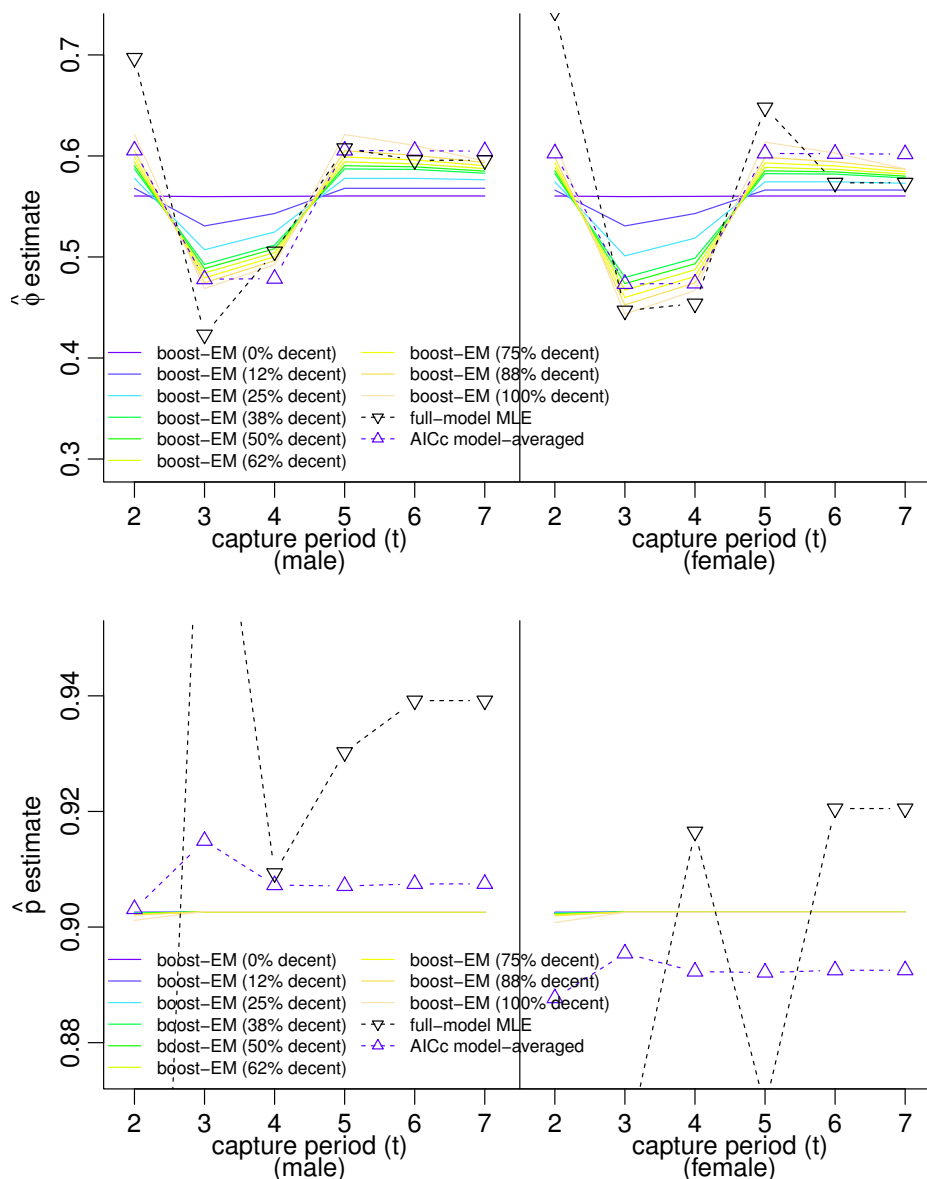

Figure 6: Dipper analysis of survival  $\phi$  and capture probability  $p$  by CJSboost-EM using non-linear base-learners (CART-like trees), plus comparison with AICc model-averaging and MLE ( $\hat{\phi}(t \times \text{sex}) \hat{p}(t \times \text{sex})$ ). The regularization pathway of the estimates is visualized with the spectrum-coloured lines, starting at the intercept-only model (0% decent) and growing more complex as the gradient descent algorithm proceeds. The final estimates are achieved at 100% of the descent, when the boosting iteration  $m_{CV}$  is reached.

- 506 their posterior inclusion probabilities (over all  $m$ ) were 0.98 and 0.96 for  $\phi$  and  $p$ , respectively.
- 507 ii) For the non-influential covariates, the stability selection probabilities at  $m_{CV}$  were low,  $S^{(m_{CV})} \lesssim 0.5$ ,
- 508 and rarely achieved a  $S^{(m_{CV})} > 0.8$  by  $m_{CV}$ . Only 1.2% of such covariates achieved  $S^{(m_{CV})} \geq 0.95$  by
- 509  $m_{CV}$ , for both  $\phi$  and  $p$ . On average, their inclusion probabilities were 0.32 for  $\phi$  and 0.38 for  $p$ .
- 510 iii) The stability path of the time-as-a-categorical-variable (a.k.a  $\theta(t)$ , in *blue*, Figure 8) showed a greater
- 511 tendency for inclusion and achieved high stability selection probabilities, particularly for  $p$ . For  $p$ , it

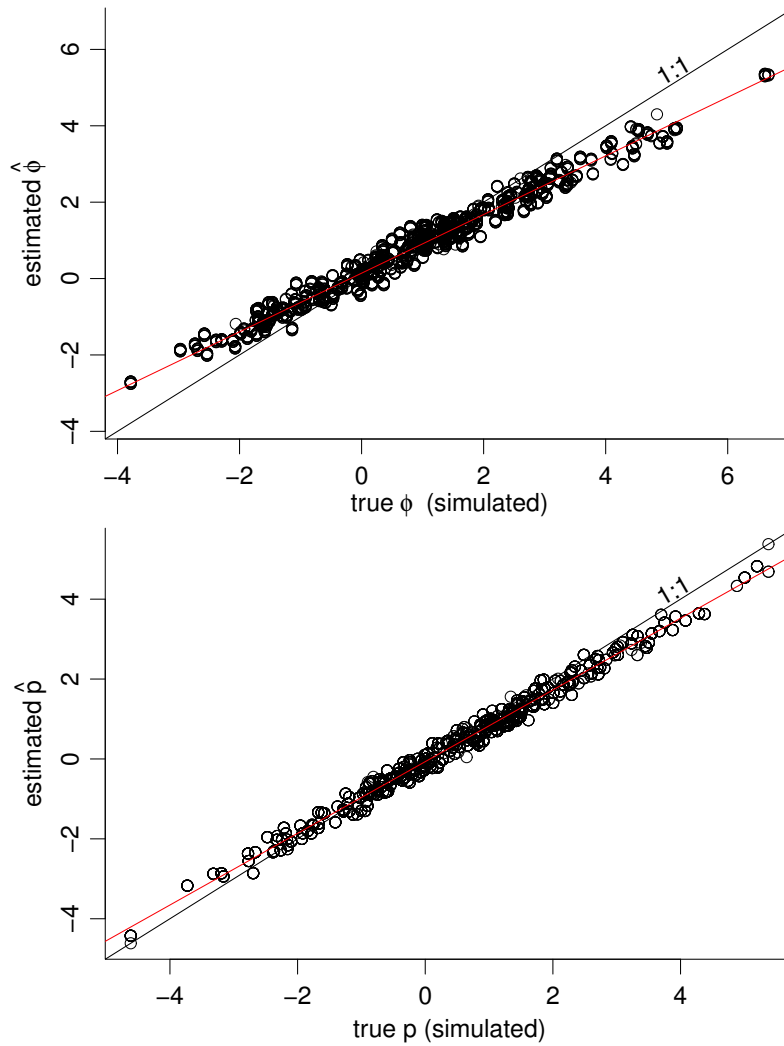

Figure 7: Comparing true vs estimated survival  $\phi_{i,t}$  and capture probability  $p_{i,t}$  for individuals  $i$  at capture-period  $t$ . Boosted estimates incur some downward bias (evident in the difference between the 1:1 line and the estimates' red trend-line) due to shrinkage of coefficients to the intercept-only model.

512 achieved  $S_p^{(m_{CV})} \geq 0.95$  by  $m_{CV}$  in 60% of simulations (in which it was not truly influential). Its inclusion  
 513 probabilities were 0.49 for  $\phi$  and 0.75 for  $p$ , averaged over all simulations. This has important implications  
 514 for model-selection consistency (or lack thereof). This may explain the anecdotal experience that, to have  
 515 good-fitting capture-recapture models, one must usually incorporate time-varying capture-probabilities.  
 516 iv) The stability paths of covariates which were important in one parameter (like  $\phi$ ) but unimportant in the  
 517 other parameter (like  $p$ ) seemed to achieve higher inclusions probabilities (in *pink*, Figure 8), more so  
 518 than the other non-influential covariates in grey. For  $p$ , such covariates achieved  $S_p^{(m_{CV})} \geq 0.95$  in 10%  
 519 of simulations, and in 3.3% of simulations for  $\phi$ . This suggests an underlying structural correlation and  
 520 may have implications for model-selection consistency.

521 Table 1 shows the coefficients of a prediction-optimal CJSboost model for one simulation (same as Figures

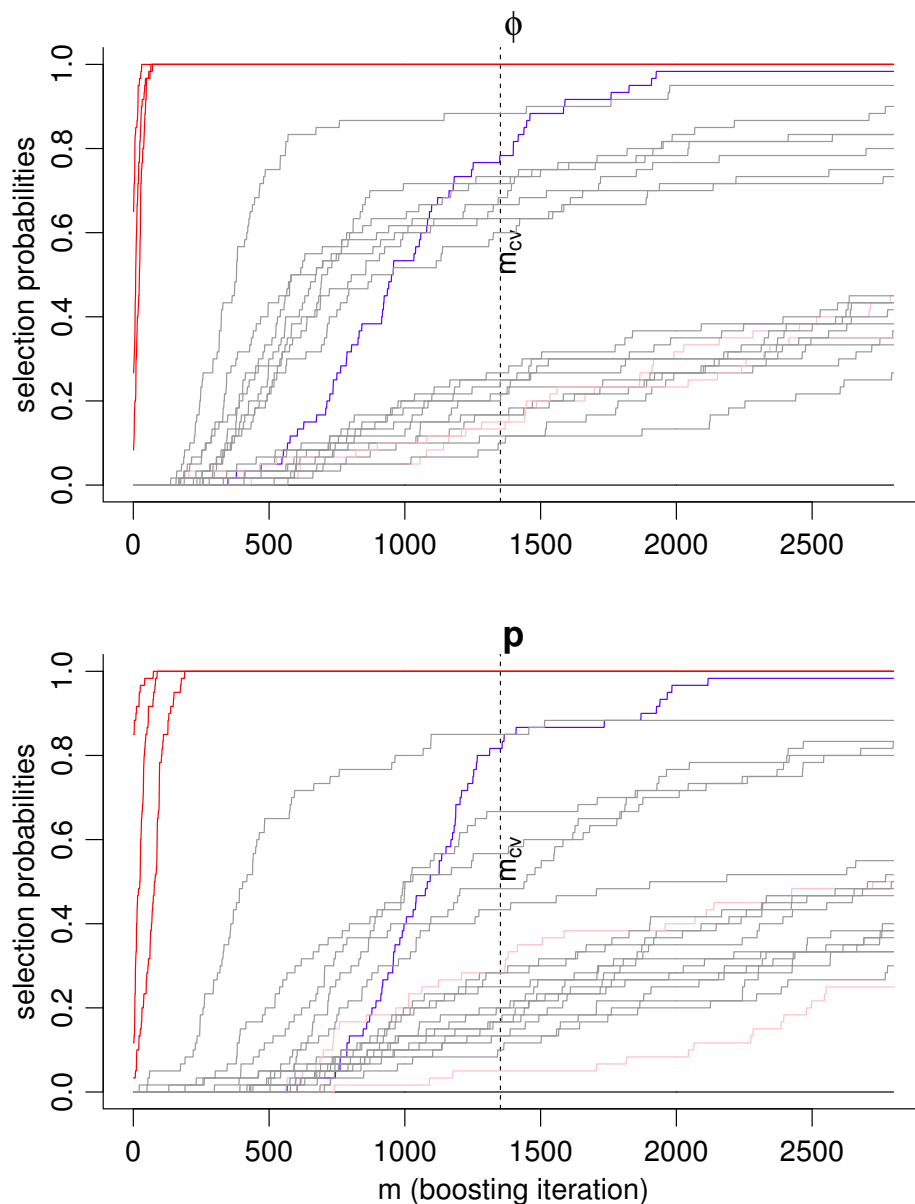

Figure 8: Demonstration of stability selection probabilities for one high-dimensional simulation. As the boosting iteration ( $m$ ) gets large, regularization gets weaker, and all covariates have a higher selection probability  $S$  (estimated from a bootstrap). Lines in **red** are truly influential covariates. Lines in **gray** are non-influential covariates. Lines in **pink** are not-influential for  $\theta$ , but are influential in the other parameter  $-\theta$ . Lines in **blue** represent the time-as-a-categorical-variable base-learner, a.k.a  $\theta(t)$ , which in this simulation was non-influential.

522 7 and 8). As expected, the regularized regression coefficients placed highest weight on the 6 truly influential  
 523 covariates, albeit with a downward bias that is characteristic of  $\ell_1$  regularization (the true values were  $\|\beta_k\| =$   
 524 1). The model shrunk the remaining non-influential coefficients to low values, but not to zero, incurring a  
 525 False Discovery Rate of 0.34. Table 1 also demonstrates the effects of coefficient hard-thresholding using the  
 526 posterior inclusion probabilities estimated in Figure 8. At higher thresholds (0.80-0.95), the model succeeds  
 527 in having a FDR and FRR of zero, as well as accurate unbiased estimates of the coefficients (seemingly an

Table 1: Estimates of coefficients from CJSboost, for one high-dimensional model-selection problem, under different degrees of hard-thresholding

| Parameter                                 | Survival $\Phi$                 |        |        |                                              |               |               |               |               |        |        | MLE Oracle <sup>§</sup> | SE Oracle |
|-------------------------------------------|---------------------------------|--------|--------|----------------------------------------------|---------------|---------------|---------------|---------------|--------|--------|-------------------------|-----------|
|                                           | Prediction Optimal <sup>†</sup> | 0.55   | 0.65   | Inclusion Probability Threshold <sup>‡</sup> |               |               |               |               |        |        |                         |           |
| $\hat{\beta}_\phi$ (time:1)               | -0.002                          | -0.01  | 0      | 0                                            | 0             | 0             | 0             | 0             | 0      | 0      | 0                       | 0         |
| $\hat{\beta}_\phi$ (time:2)               | -0.041                          | -0.238 | 0      | 0                                            | 0             | 0             | 0             | 0             | 0      | 0      | 0                       | 0         |
| $\hat{\beta}_\phi$ (time:3)               | -0.036                          | -0.271 | 0      | 0                                            | 0             | 0             | 0             | 0             | 0      | 0      | 0                       | 0         |
| $\hat{\beta}_\phi$ (time:4)               | -0.026                          | -0.285 | 0      | 0                                            | 0             | 0             | 0             | 0             | 0      | 0      | 0                       | 0         |
| $\hat{\beta}_\phi$ (time:5)               | 0.017                           | 0.205  | 0      | 0                                            | 0             | 0             | 0             | 0             | 0      | 0      | 0                       | 0         |
| $\hat{\beta}_\phi$ (time:6)               | 0.006                           | -0.005 | 0      | 0                                            | 0             | 0             | 0             | 0             | 0      | 0      | 0                       | 0         |
| $\hat{\beta}_\phi$ (time:7)               | 0.015                           | 0.124  | 0      | 0                                            | 0             | 0             | 0             | 0             | 0      | 0      | 0                       | 0         |
| $\hat{\beta}_\phi$ (time:8)               | 0.022                           | 0.196  | 0      | 0                                            | 0             | 0             | 0             | 0             | 0      | 0      | 0                       | 0         |
| $\hat{\beta}_\phi$ (time:9)               | 0.025                           | 0.264  | 0      | 0                                            | 0             | 0             | 0             | 0             | 0      | 0      | 0                       | 0         |
| $\hat{\beta}_\phi$ (time:10)              | -0.001                          | -0.091 | 0      | 0                                            | 0             | 0             | 0             | 0             | 0      | 0      | 0                       | 0         |
| $\hat{\beta}_\phi$ (a)                    | -0.083                          | -0.173 | 0      | 0                                            | 0             | 0             | 0             | 0             | 0      | 0      | 0                       | 0         |
| $\hat{\beta}_\phi$ (b)                    | 0.828                           | 0.982  | 1.064  | 1.045                                        | <b>1.067</b>  | <b>1.067</b>  | <b>1.067</b>  | <b>1.067</b>  | 1.074  | 1.068  | 0.143                   | 0         |
| $\hat{\beta}_\phi$ (c)                    | -0.021                          | 0      | 0      | 0                                            | 0             | 0             | 0             | 0             | 0      | 0      | 0                       | 0         |
| $\hat{\beta}_\phi$ (d)                    | -0.761                          | -0.93  | -0.991 | -0.983                                       | <b>-0.965</b> | <b>-0.965</b> | <b>-0.965</b> | <b>-0.965</b> | -0.919 | -0.967 | 0.123                   | 0         |
| $\hat{\beta}_\phi$ (e)                    | 0.175                           | 0.262  | 0.288  | 0.303                                        | 0             | 0             | 0             | 0             | 0      | 0      | 0                       | 0         |
| $\hat{\beta}_\phi$ (f)                    | 0                               | 0      | 0      | 0                                            | 0             | 0             | 0             | 0             | 0      | 0      | 0                       | 0         |
| $\hat{\beta}_\phi$ (g)                    | 0                               | 0      | 0      | 0                                            | 0             | 0             | 0             | 0             | 0      | 0      | 0                       | 0         |
| $\hat{\beta}_\phi$ (h)                    | 0                               | 0      | 0      | 0                                            | 0             | 0             | 0             | 0             | 0      | 0      | 0                       | 0         |
| $\hat{\beta}_\phi$ (i)                    | -0.051                          | -0.107 | 0      | 0                                            | 0             | 0             | 0             | 0             | 0      | 0      | 0                       | 0         |
| $\hat{\beta}_\phi$ (j)                    | 0                               | 0      | 0      | 0                                            | 0             | 0             | 0             | 0             | 0      | 0      | 0                       | 0         |
| $\hat{\beta}_\phi$ (k)                    | -0.717                          | -0.838 | -0.975 | -0.968                                       | <b>-0.953</b> | <b>-0.953</b> | <b>-0.953</b> | <b>-0.953</b> | -0.868 | -0.955 | 0.119                   | 0         |
| $\hat{\beta}_\phi$ (l)                    | 0                               | 0      | 0      | 0                                            | 0             | 0             | 0             | 0             | 0      | 0      | 0                       | 0         |
| $\hat{\beta}_\phi$ (m)                    | 0                               | 0      | 0      | 0                                            | 0             | 0             | 0             | 0             | 0      | 0      | 0                       | 0         |
| $\hat{\beta}_\phi$ (n)                    | 0                               | 0      | 0      | 0                                            | 0             | 0             | 0             | 0             | 0      | 0      | 0                       | 0         |
| $\hat{\beta}_\phi$ (o)                    | 0                               | 0      | 0      | 0                                            | 0             | 0             | 0             | 0             | 0      | 0      | 0                       | 0         |
| $\hat{\beta}_\phi$ (p)                    | 0                               | 0      | 0      | 0                                            | 0             | 0             | 0             | 0             | 0      | 0      | 0                       | 0         |
| $\hat{\beta}_\phi$ (q)                    | 0                               | 0      | 0      | 0                                            | 0             | 0             | 0             | 0             | 0      | 0      | 0                       | 0         |
| $\hat{\beta}_\phi$ (r)                    | -0.048                          | -0.151 | 0      | 0                                            | 0             | 0             | 0             | 0             | 0      | 0      | 0                       | 0         |
| $\hat{\beta}_\phi$ (s:1)                  | -0.034                          | -0.109 | 0      | 0                                            | 0             | 0             | 0             | 0             | 0      | 0      | 0                       | 0         |
| $\hat{\beta}_\phi$ (s:2)                  | 0.028                           | 0.093  | 0      | 0                                            | 0             | 0             | 0             | 0             | 0      | 0      | 0                       | 0         |
| $\hat{\beta}_\phi$ (t:1)                  | 0                               | 0      | 0      | 0                                            | 0             | 0             | 0             | 0             | 0      | 0      | 0                       | 0         |
| $\hat{\beta}_\phi$ (t:2)                  | 0                               | 0      | 0      | 0                                            | 0             | 0             | 0             | 0             | 0      | 0      | 0                       | 0         |
| $\hat{\beta}_\phi$ (u:1)                  | -0.061                          | -0.165 | 0      | 0                                            | 0             | 0             | 0             | 0             | 0      | 0      | 0                       | 0         |
| $\hat{\beta}_\phi$ (u:2)                  | 0.059                           | 0.166  | 0      | 0                                            | 0             | 0             | 0             | 0             | 0      | 0      | 0                       | 0         |
| <b>Capture Probability <math>p</math></b> |                                 |        |        |                                              |               |               |               |               |        |        |                         |           |
| $\hat{\beta}_p$ (time:1)                  | 0                               | 0.002  | 0      | 0                                            | 0             | 0             | 0             | 0             | 0      | 0      | 0                       | 0         |
| $\hat{\beta}_p$ (time:2)                  | 0                               | 0.266  | 0      | 0                                            | 0             | 0             | 0             | 0             | 0      | 0      | 0                       | 0         |
| $\hat{\beta}_p$ (time:3)                  | 0                               | -0.23  | 0      | 0                                            | 0             | 0             | 0             | 0             | 0      | 0      | 0                       | 0         |
| $\hat{\beta}_p$ (time:4)                  | 0                               | -0.041 | 0      | 0                                            | 0             | 0             | 0             | 0             | 0      | 0      | 0                       | 0         |
| $\hat{\beta}_p$ (time:5)                  | 0                               | -0.098 | 0      | 0                                            | 0             | 0             | 0             | 0             | 0      | 0      | 0                       | 0         |
| $\hat{\beta}_p$ (time:6)                  | 0                               | 0.159  | 0      | 0                                            | 0             | 0             | 0             | 0             | 0      | 0      | 0                       | 0         |
| $\hat{\beta}_p$ (time:7)                  | 0                               | -0.04  | 0      | 0                                            | 0             | 0             | 0             | 0             | 0      | 0      | 0                       | 0         |
| $\hat{\beta}_p$ (time:8)                  | 0                               | 0.123  | 0      | 0                                            | 0             | 0             | 0             | 0             | 0      | 0      | 0                       | 0         |
| $\hat{\beta}_p$ (time:9)                  | 0                               | -0.056 | 0      | 0                                            | 0             | 0             | 0             | 0             | 0      | 0      | 0                       | 0         |
| $\hat{\beta}_p$ (time:10)                 | 0                               | -0.062 | 0      | 0                                            | 0             | 0             | 0             | 0             | 0      | 0      | 0                       | 0         |
| $\hat{\beta}_p$ (a)                       | 0                               | 0      | 0      | 0                                            | 0             | 0             | 0             | 0             | 0      | 0      | 0                       | 0         |
| $\hat{\beta}_p$ (b)                       | 0.942                           | 1.129  | 1.149  | 1.184                                        | <b>1.176</b>  | <b>1.176</b>  | <b>1.176</b>  | <b>1.176</b>  | 0.846  | 1.178  | 0.144                   | 0         |
| $\hat{\beta}_p$ (c)                       | 0                               | 0      | 0      | 0                                            | 0             | 0             | 0             | 0             | 0      | 0      | 0                       | 0         |
| $\hat{\beta}_p$ (d)                       | 0                               | 0      | 0      | 0                                            | 0             | 0             | 0             | 0             | 0      | 0      | 0                       | 0         |
| $\hat{\beta}_p$ (e)                       | 0                               | 0      | 0      | 0                                            | 0             | 0             | 0             | 0             | 0      | 0      | 0                       | 0         |
| $\hat{\beta}_p$ (f)                       | -0.933                          | -1.142 | -1.181 | -1.189                                       | <b>-1.186</b> | <b>-1.186</b> | <b>-1.186</b> | <b>-1.186</b> | -0.856 | -1.189 | 0.135                   | 0         |
| $\hat{\beta}_p$ (g)                       | 0                               | 0      | 0      | 0                                            | 0             | 0             | 0             | 0             | 0      | 0      | 0                       | 0         |
| $\hat{\beta}_p$ (h)                       | 0                               | 0      | 0      | 0                                            | 0             | 0             | 0             | 0             | 0      | 0      | 0                       | 0         |
| $\hat{\beta}_p$ (i)                       | 0                               | 0      | 0      | 0                                            | 0             | 0             | 0             | 0             | 0      | 0      | 0                       | 0         |
| $\hat{\beta}_p$ (j)                       | 0                               | 0      | 0      | 0                                            | 0             | 0             | 0             | 0             | 0      | 0      | 0                       | 0         |
| $\hat{\beta}_p$ (k)                       | 0                               | 0      | 0      | 0                                            | 0             | 0             | 0             | 0             | 0      | 0      | 0                       | 0         |
| $\hat{\beta}_p$ (l)                       | 0                               | 0      | 0      | 0                                            | 0             | 0             | 0             | 0             | 0      | 0      | 0                       | 0         |
| $\hat{\beta}_p$ (m)                       | 0.042                           | 0      | 0      | 0                                            | 0             | 0             | 0             | 0             | 0      | 0      | 0                       | 0         |
| $\hat{\beta}_p$ (n)                       | 0.01                            | 0      | 0      | 0                                            | 0             | 0             | 0             | 0             | 0      | 0      | 0                       | 0         |
| $\hat{\beta}_p$ (o)                       | 0.81                            | 0.993  | 1.033  | 1.047                                        | <b>1.059</b>  | <b>1.059</b>  | <b>1.059</b>  | <b>1.059</b>  | 0      | 1.061  | 0.124                   | 0         |
| $\hat{\beta}_p$ (p)                       | 0                               | 0      | 0      | 0                                            | 0             | 0             | 0             | 0             | 0      | 0      | 0                       | 0         |
| $\hat{\beta}_p$ (q)                       | -0.027                          | 0      | 0      | 0                                            | 0             | 0             | 0             | 0             | 0      | 0      | 0                       | 0         |
| $\hat{\beta}_p$ (r)                       | -0.063                          | 0      | 0      | 0                                            | 0             | 0             | 0             | 0             | 0      | 0      | 0                       | 0         |
| $\hat{\beta}_p$ (s:1)                     | -0.15                           | -0.202 | -0.243 | 0                                            | 0             | 0             | 0             | 0             | 0      | 0      | 0                       | 0         |
| $\hat{\beta}_p$ (s:2)                     | 0.116                           | 0.161  | 0.197  | 0                                            | 0             | 0             | 0             | 0             | 0      | 0      | 0                       | 0         |
| $\hat{\beta}_p$ (t:1)                     | 0                               | 0      | 0      | 0                                            | 0             | 0             | 0             | 0             | 0      | 0      | 0                       | 0         |
| $\hat{\beta}_p$ (t:2)                     | 0                               | 0      | 0      | 0                                            | 0             | 0             | 0             | 0             | 0      | 0      | 0                       | 0         |
| $\hat{\beta}_p$ (u:1)                     | 0                               | 0      | 0      | 0                                            | 0             | 0             | 0             | 0             | 0      | 0      | 0                       | 0         |
| $\hat{\beta}_p$ (u:2)                     | 0                               | 0      | 0      | 0                                            | 0             | 0             | 0             | 0             | 0      | 0      | 0                       | 0         |
| <b>False Discovery Rate:</b>              | 0.342                           | 0.237  | 0.053  | 0.026                                        | 0             | 0             | 0             | 0             | 0      | 0      | 0                       | 0         |
| <b>False Rejection Rate:</b>              | 0                               | 0      | 0      | 0                                            | 0             | 0             | 0             | 0             | 0.167  | 0      | 0                       | 0         |

**Bold coefficients** show oracle-properties.

Covariates a-r are continuous; covariates s-u are categorical;  $\beta$ (time:t) is equivalent to a  $\theta(t)$  sub-model.

<sup>†</sup> CJSboost-EM model with  $m_{stop}$  tuned by bootstrap-validation.

<sup>‡</sup> Debiased CJSboost-EM model (unregularized;  $m \rightarrow \infty$ ) after discarding covariates with inclusion probabilities below a threshold.

<sup>§</sup> MLEs when the true model is known in advance.



528 “oracle”, for this one simulation). The optimal threshold seems to be in the of 0.80-0.95, similar to the  
529 threshold suggested by Bach (2008) and Meinshausen & Bühlmann (2010). After “debiasing” (Murphy,  
530 2012c; here, meaning running  $m \rightarrow \infty$  after hard-thresholding), the CJSboost estimates become nearly equal  
531 to the oracle MLEs (a benchmark model run with 100% foresight about the true model). Thresholding at low  
532 values ( $< 0.8$ ) and debiasing added too much weight on some non-influential covariates (i.e., no shrinkage),  
533 whereas thresholding at extremely high values ( $> 0.95$ ) incurred a False Rejection.

#### 534 4. Discussion

535 This study presents a boosted ensemble method for the Cormack-Jolly-Seber capture-recapture model,  
536 called CJSboost. I compared its estimates to AICc model-averaging. While univariate boosting is well-known  
537 in applied ecology (Elith et al., 2008; Hothorn et al., 2010; Tyne et al., 2015), the naive application of boosting  
538 for capture-recapture was not possible because of the serially-dependent nature of capture-histories. In  
539 response to this challenge, this paper presents two modifications to the Component-wise Boosting procedure,  
540 one based on Expectation-Maximization (first suggested in the appendix of Ward et al., 2009) and another  
541 based on Monte-Carlo imputation of HMM latent states. Both lead to equivalent inferences (up to an  
542 approximation error) and serve to validate each other. Code and a tutorial are available on the Github site  
543 <http://github.com/farawayinspace/HMMboost>. The framework can be easily extended to other capture-  
544 recapture systems, thereby introducing new machine-learning techniques to capture-recapture practitioners,  
545 such as CART-like trees, splines and kernels.

546 The motivation for boosted capture-recapture models are many:

- 547 1. automatic variable selection and step-wise multimodel inference (without the sometimes-impossible task  
548 of fitting all possible fixed-effects models, as in AIC-based model averaging);
- 549 2. regularization and sparse estimation, which deflate the influence of unimportant covariates;
- 550 3. shrinkage of estimates away from extreme values and inadmissible values (e.g.,  $\phi = 1$ );
- 551 4. a smoother way to address parameter non-identifiability issues, via regularization and step-wise esti-  
552 mation, rather than arbitrary constraints (e.g., fixing  $\phi_T = \phi_{T-1}$ );
- 553 5. highly extensible (see the wide variety of base-learners available under the `mboost` package, Bühlmann  
554 & Hothorn, 2007; Hofner et al., 2012);
- 555 6. inference based on predictive performance.

556 Through simulation and an analysis of the European Dipper dataset (Lebreton et al., 1992), this study  
557 is primarily concerned with comparisons of CJSboost to AICc model-averaging. This is not because of  
558 theoretical connections between the two (although some do exist); rather, AIC model-selection and model-  
559 averaging are the incumbent multimodel inference techniques in capture-recapture practise. It is therefore  
560 very reassuring that estimates from CJSboost and AICc model-averaging are qualitatively comparable, re-  
561 vealing strikingly similar patterns. This was apparent among simple least-squares base-learners as well as

562 purely-algorithmic base-learners like CART. One distinction was that the CJSboost models were slightly more  
563 conservative and had more shrinkage on coefficients. This is desirable, especially during the current crisis  
564 of reproducibility (Simmons et al., 2011; Yaffe, 2015), because the AIC is thought to be overly permissive  
565 (Shao, 1993, 1997; Burnham & Anderson, 2004; Vrieze, 2012; Hooten & Hobbs, 2015).

566 Secondly, the AIC serves as a useful conceptual bridge for introducing practitioners to the notion of  
567 regularization and predictive performance. For instance, the AIC is itself a specific type of regularized  
568 objective function (fixed-penalty  $\ell_0$  regularizer) nested within a more general class of regularizers, within  
569 which Component-wise Boosting is generally considered a  $\ell_1$  regularizer (Efron et al., 2004; Bühlmann &  
570 Hothorn, 2007). The AIC also has a cross-validation interpretation (Stone, 1977; Shao, 1993, 1997). There-  
571 fore, capture-recapture practitioners, who are already (perhaps unwittingly) using predictive-performance  
572 and regularization, should expand their concept of “model parsimony” and multi-model inference to include  
573 boosting. There has been a call for ecologists to embrace algorithmic means of inference (Oppel et al., 2009),  
574 and now this is available to capture-recapture practitioners.

#### 575 *4.1. Inference under boosting*

576 One potential problem of boosted capture-recapture models is the new thinking required to understand  
577 what it is and how to describe its results. With origins in machine-learning, such algorithmic inference  
578 procedures may seem incomprehensible to ecologists: they may begrudge the lack of familiar inference tools  
579 like  $p$ -values and 95%CI (although, these are frequently misused; Hoekstra et al., 2014; Morey et al., 2016)  
580 or AIC weights. I offer two ways to understand boosting: comparison with other regularizers, and as a type  
581 of multi-model inference optimized for prediction.

582 In univariate analyses, boosting has some relationships to other procedures (see Meir & Rätsch, 2003, for  
583 an overview). For linear-models with Gaussian error, component-wise boosting is generally equivalent to the  
584 Lasso (Efron et al., 2004; Bühlmann & Hothorn, 2007). The Lasso can be viewed as simultaneously optimizing  
585 a goodness-of-fit term (i.e., a loss function) and a *penalty* on model complexity (the  $\ell_1$ -norm on regression  
586 coefficients). This form should be immediately familiar to most ecologists: the AIC also has a goodness-of-  
587 fit term and a fixed-penalty on model complexity ( $-2\ell_0$ -norm of regression coefficients). Hooten & Hobbs  
588 (2015) unify these ideas in a Bayesian framework: regularization is merely a strong prior disfavoring model  
589 complexity; more formally, regularized risk minimization is equivalent to Bayesian Maximum A-posteriori  
590 Probability (MAP) estimation (Murphy, 2012a), when the loss function is the negative log-likelihood. This is  
591 a helpful perspective, because inasmuch as capture-recapture practitioners are turning to Bayesian solutions  
592 under sparse data (Schofield et al., 2009; Schofield & Barker, 2011; Rankin et al., 2014, 2016), the CJSboost  
593 framework is allied and should be seriously considered. The above equivalences are more difficult to motivate  
594 using quixotic base-learners like CART-like trees, but which otherwise have great empirical performance  
595 under complex interactions and non-linear associations.

596 A second view of boosting is as an ensemble of many small models, like model-averaging. The terminology  
597 of a “learner” hails from its machine-learning origins, but base-learners are really just familiar analytic

598 techniques commonly used for standalone modelling, like Ordinary Least Squares regression or CART. The  
599 influence of any one model is *weighted* according to the step-wise gradient descent procedure known as  
600 Boosting. Consider the case of Ordinary Least Squares base-learners: under extreme regularization ( $m = 1$ ),  
601 the boosted estimates are the MLE of a simple intercept model (e.g.  $\hat{\phi}(\cdot)\hat{p}(\cdot)$ ). At weaker regularization  
602  $m \rightarrow \infty$ , the estimates tend to the MLEs of the fully-saturated model (Mayr et al., 2012). In between  
603 these extremes, at  $m_{\text{stop}} = m_{\text{CV}}$ , the estimates are *shrunk*, and somewhat qualitatively similar to AICc  
604 model-averaging. The size of the ensemble and its complexity is governed by predictive performance (through  
605 cross-validation or bootstrap-validation). Thus, the resulting multimodel prediction function is that which  
606 minimizes the expected loss, and is therefore constrained from over-fitting. Unsurprisingly, the estimates  
607 have a slight downward bias but are more stable across outliers and different realizations of the data (i.e.  
608 favouring low-variance in the classic “bias-variance” trade-off; Bühlmann & Yu, 2003; Murphy, 2012a).

609 But what can one say about “significance” or “biological importance”? The answer is the interpretation  
610 of the additive coefficients (assuming they are similarly scaled): coefficients with the largest absolute values  
611 are the most influential on survival or capture probability. Using bootstrap stability-selection, we can also  
612 use approximate posterior inclusion probabilities as a type of uncertainty statistic: covariates/base-learners  
613 with high inclusion probabilities are probably more important; covariates with low inclusion probabilities  
614 ( $< 0.5$ ) are probably not that important. Probabilities lead to straight-forward inference. The stability  
615 paths (Figure 8) may also help visually discriminate between important covariates and noisy non-influential  
616 covariates, as suggested by Meinshausen & Bühlmann (2010): they notice a visual pattern whereby the  
617 true-model covariates enter the ensemble earlier and peel away from the unimportant covariates.

618 The above interpretations are hardly more difficult than understanding the AIC and model-averaging. In  
619 the applied ecological literature, there are few authors who formally justify a preference for the AIC versus  
620 other regularization and prediction techniques. Neither do ecologists seem to weigh in on philosophical  
621 arguments in favour of a prediction-optimal model versus a sparse model. Such matters are confused by  
622 a literature that is unclear about the underlying justification for AIC weighting and averaging (compare,  
623 for example, statements by Burnham & Anderson, 2004, vs Raftery, 1995 and Hooten & Hobbs, 2015,  
624 about AIC weights as model probabilities). Commonly, ecologists cite “model parsimony” and Kullback-  
625 Leibler divergence as a justification for the AIC. This particular view of parsimony, however, favours certain  
626 outcomes.

627 Burnham & Anderson (2004) offer a formal defence of the AIC and AIC model-averaging based on a notion  
628 of covariate “tapering”: the view that a response variable should theoretically have many small influences,  
629 possibly infinite, and our analyses should increasingly reveal more of these minor influences as we collect  
630 more data. They argue that natural phenomena are not “sparse”, unlike the systems studied by computer  
631 scientists, nor is there ever a “true model” (an oxymoron). This view is echoed by Vrieze (2012). The tapered  
632 worldview seems compelling for analyzing complex biological systems, where everything influences everything  
633 else. It is also, conveniently, the scenario in which the AIC and LOOCV are asymptotically prediction optimal

634 and model-selection consistent (Shao, 1993, 1997; Burnham & Anderson, 2004; Vrieze, 2012).

#### 635 4.2. *Tapering vs sparsity*

636 Nonetheless, I offer four arguments for capture-recapture methods to be more conservative. First, in  
637 an era of “Big Data” (geo-spatial, genetic, bio-logging, etc.) analysts increasingly have access to dozens of  
638 inventive potential covariates, many of which are different operationalizations of the same physical phenomena  
639 (e.g., consider the many ways one can measure Sea-Surface Temperature at multiple space-time scales).  
640 This Big Data deluge requires sparser discrimination among covariates, and if not, may encourage fishing  
641 for significance. Second, in an era of questionable scientific reproducibility (Simmons et al., 2011; Yaffe,  
642 2015), we need better control on False Discoveries (among other things). This is a huge challenge, because  
643 from an optimal-prediction perspective, a False Rejection is much more costly to the expected loss than a  
644 shrunken False Discovery (Shao, 1993), thus making procedures overly liberal, including both the AIC and  $\ell_1$   
645 regularizers. Third, there may be structural correlations in capture-recapture procedures that strongly favour  
646 certain outcomes, and which may preclude any hope for sparse, model-selection consistent estimates. I offer  
647 no theory to back this claim, but based on high-dimensional simulations, this study reveals high posterior  
648 inclusion probabilities for  $p(t)$  models (even when it is not the true model), as well as for covariates which  
649 are significant in one component, but not the other. This is likely not a feature of CJSboost, but a more  
650 widespread capture-recapture phenomenon (see Bailey et al., 2010 and Rankin et al., 2016, for problems of  
651 partial-identifiability of parameter estimates in capture-recapture). It can be expected to be more severe  
652 under low-detection probabilities. Fourth, in the author’s experience, the AIC/AICc seems to favour over-  
653 parametrized models that would be inadmissible under a Bayesian or a prediction paradigm, such as 100%  
654 survival and (the more ambiguous) 100% capture probability. Here, shrinkage on extreme values under  
655 regularization is similar to a Bayesian weak prior against boundary values.

656 To be clear, prediction-optimal  $\ell_1$  regularization, like L2boosting and the Lasso, are not very sparse,  
657 nor are they model-selection consistent (Meinshausen & Bühlmann, 2006; Zou, 2006; Bühlmann & Hothorn,  
658 2010). They do, however, have more shrinkage on complexity than the AICc (Shao, 1997; Bühlmann &  
659 Hothorn, 2007) and AICc model-averaging, which is demonstrated in this study through simulation and an  
660 analysis of a real dataset. For more sparse model selection, the technique of bootstrapped stability selection  
661 (Meinshausen & Bühlmann, 2010; Murphy, 2012c) can be used to hard-threshold covariates which have low  
662 posterior inclusion probabilities ( $\lesssim 0.8-0.95$ ).

#### 663 4.3. *Multimodel inference: build-up or post-hoc?*

664 A boosted ensemble is built from the simplest intercept model and then “grows” more complex in a  
665 step-wise manner. This is the reverse of many multimodel inference techniques that do *post-hoc* weighting  
666 of models, such as AIC model-averaging and Bayesian model-averaging. However, the *post-hoc* approach  
667 becomes unmanageable with just a few covariates and parameters, given the combinatorial explosion in the  
668 number of plausible fixed-effect models. There is a risk that well-intentioned researchers will take short-cuts,

669 such as a step-wise search strategy (Pérez-Jorge et al., 2016; Taylor et al., 2016), which may be susceptible  
670 to local-minima.

671 In conventional boosting, use of a convex loss function ensures that the gradient descent does not get stuck  
672 in a local minima. For non-convex problems, such as gamboostLSS (Mayr et al., 2012) and CJSboost, forced  
673 weakness/constraints on base-learners makes the problem more defined, but inevitably the start-values will  
674 dictate the direction of the gradient descent. However, for CJS and most capture-recaptures models, there  
675 is usually a well-defined intercept-only model that can serve as a principled way to initialize the predictions,  
676 such that if a unique MLE exists for the fully-saturated model, the boosting algorithm will reach it as  $m \rightarrow \infty$ .  
677 If there are parameter non-identifiability issues (such as for  $\{\phi_T, p_T\}$ ), early stopping will ensure that the  
678 shrinkage is in the direction of the intercept-only model. Or, classic constraints can be imposed within the  
679 base-learners, such as fixing  $\phi_T = \phi_{T-1}$ .

#### 680 4.4. Extensions and future considerations

681 This study is merely the first step in developing and introducing boosting for HMM and capture-recapture.  
682 Many of the properties which hold for univariate Component-wise Boosting will need theoretical and empirical  
683 validation. Many questions arise, for example, how do the selection properties vary by sample-size, especially  
684 in reference to BIC and AIC model-averaging? How sensitive are the results to low detection probabilities?  
685 Does the EM technique and/or the MC technique generalize to multi-state models? How important is tuning  
686 both hyperparameters  $m$  and  $\nu$ ? Does the algorithm always reach the MLE of the fully-saturated model  
687 as  $m \rightarrow \infty$  and under what conditions does it fail? Is CJSboost and AICc-selection minimax optimal for  
688 mark-recapture?

689 By validating the boosting technique for a simple open-population model, this study paves the way for  
690 more popular capture-recapture models, such as POPAN and the PCRD, which have more model param-  
691 eters in the likelihood function, like temporary-migration processes. With more parameters, the boosting  
692 algorithms will require more efficient ways of tuning hyperparameters. See Appendix B.2 for ideas in this  
693 regard.

694 One major benefit of the CJSboost framework is its extensibility. It can easily accommodate phenomena  
695 such as individual heterogeneity, spatial capture-recapture and cyclic-splines. These are possible because  
696 the CJSboost code is written for compatibility with the `mboost` family of R packages, and leverages their  
697 impressive variety of base-learners (Bühlmann & Hothorn, 2007; Hofner et al., 2012). For example, the  
698 `brandom` base-learner can accommodate individual random effects for addressing individual heterogeneity in  
699 a manner similar to Bayesian Hierarchical models (Rankin et al., 2016). Kernels (`brad`) and spatial splines  
700 (`bspatial`) can be used for smooth spatial effects (Kneib et al., 2009; Hothorn et al., 2010; Tyne et al., 2015)  
701 offering an entirely new framework for spatial capture-recapture. The largest advantage is that users can  
702 add these extensions via the R formula interface, rather than having to modify deep-level code. CJSboost,  
703 therefore, offers a unified framework for many types of capture-recapture ideas that would otherwise require  
704 many different analytical paradigms to study the same suite of phenomena.

## 705 5. Conclusions

- 706 1. Boosting, the regularized gradient-descent and ensemble algorithm from machine learning, can be ap-  
707 plied to capture-recapture by reformulating the models as Hidden Markov Models, and interweaving an  
708 Expectation-Maximization E-step within each boosting iteration. An alternative boosting algorithm,  
709 based on stochastic imputation of HMM latent states, yields approximately equivalent estimates.
- 710 2. Boosting negotiates the “bias-variance” trade-off (for minimizing an expected loss) by incurring a slight  
711 bias in all coefficients, but yields estimates that are more stable to outliers and over-fitting, across  
712 multiple realizations of the data. In contrast, Maximum Likelihood estimates are unbiased, but are  
713 highly variable.
- 714 3. CJSboost allows for powerful learners, such as recursive-partitioning trees (e.g., CART) for automatic  
715 variable-selection, interaction detection, and non-linearity. This flexibility seems to come at a cost of  
716 slightly more conservative estimates (if the underlying true model is linear).
- 717 4. Both AICc model-selection and boosting are motivated by good predictive performance: minimizing an  
718 expected loss, or generalization error. When using least-squares or CART-like base-learners, the esti-  
719 mates from CJSboost are qualitatively similar to AICc model-averaging, but with increased shrinkage  
720 on coefficients.
- 721 5. CJSboost seems to perform very well in high-dimensional model selection problems, with an ability to  
722 recover a small set of influential covariates. Typically, there is a small and non-zero weight on some  
723 unimportant covariates (especially  $p(t)$  base-learners). This pattern is consistent with the performance  
724 of univariate component-wise boosting and other  $\ell_1$  regularizers.
- 725 6. If the goal of a capture-recapture analysis is not prediction, but to recover a sparse “true model”, then  
726 CJSboosted models can be hard-thresholded via stability-selection. Hard-thresholded CJSboost models  
727 show some promise towards model-selection consistency and oracle-properties, but there may be some  
728 structural correlations in capture-recapture likelihoods that make this generally untrue.

## 729 6. Acknowledgements

730 I would like to thank Professor Sayan Mukherjee for inspiration during the Duke University course Prob-  
731 abilistic Machine Learning and giving this project an initial “thumbs up”.

## 732 7. Works Cited

- 733 Akaike, H. (1974). A new look at the statistical model identification. *Automatic Control, IEEE Transactions*  
734 *on*, 19, 716 – 723. doi:10.1109/TAC.1974.1100705.
- 735 Anderson, D. R., Burnham, K. P., & Thompson, W. L. (2000). Null hypothesis testing: problems, prevalence,  
736 and an alternative. *Journal of Wildlife Management*, 64, 912–923. doi:10.2307/3803199.

- 737 Bach, F. R. (2008). Bolasso: model consistent Lasso estimation through the bootstrap. In *Proceedings of the*  
738 *25th International Conference on Machine Learning ICML '08* (pp. 33–40). New York, NY, USA: ACM.  
739 doi:10.1145/1390156.1390161.
- 740 Bailey, L. L., Converse, S. J., & Kendall, W. L. (2010). Bias, precision, and parameter redundancy in complex  
741 multistate models with unobservable states. *Ecology*, *91*, 1598–1604. doi:10.1890/09-1633.1.
- 742 Breiman, L. (1998). Arcing classifier (with discussion and a rejoinder by the author). *The Annals of Statistics*,  
743 *26*, 801–849. doi:10.1214/aos/1024691079.
- 744 Breiman, L. (1999). Prediction games and Arcing algorithms. *Neural Computation*, *11*, 1493–1517. doi:10.  
745 1162/089976699300016106.
- 746 Buckland, S. T., Burnham, K. P., & Augustin, N. H. (1997). Model selection: an integral part of inference.  
747 *Biometrics*, *53*, 603–618. doi:10.2307/2533961.
- 748 Burnham, K., & Anderson, D. (2014). P values are only an index to evidence: 20th-vs. 21st-century statistical  
749 science. *Ecology*, *95*, 627–630. doi:10.1890/13-1066.1.
- 750 Burnham, K. P., & Anderson, D. R. (2004). Multimodel inference: understanding AIC and BIC in model  
751 selection. *Sociological Methods & Research*, *33*, 261–304. doi:10.1177/0049124104268644.
- 752 Burnham, K. P., & Overton, W. S. (1978). Estimation of the size of a closed population when capture  
753 probabilities vary among animals. *Biometrika*, *65*, 625 – 633. doi:10.1093/biomet/65.3.625.
- 754 Bühlmann, P., & Hothorn, T. (2007). Boosting algorithms: regularization, prediction and model fitting.  
755 *Statistical Science*, *22*, 477–505. doi:10.1214/07-STS242.
- 756 Bühlmann, P., & Hothorn, T. (2010). Twin Boosting: improved feature selection and prediction. *Statistics*  
757 *and Computing*, *20*, 119–138. doi:10.1007/s11222-009-9148-5.
- 758 Bühlmann, P., & Yu, B. (2003). Boosting with the L2 loss: regression and classification. *Journal of the*  
759 *American Statistical Association*, *98*, 324–339. doi:10.1198/016214503000125.
- 760 Carothers, A. (1973). The effects of unequal catchability on Jolly-Seber estimates. *Biometrics*, *29*, 79–100.  
761 doi:10.2307/2529678.
- 762 David Draper (2010). Discussion: Stability selection. *Journal of the Royal Statistical Society: Series B*  
763 *(Statistical Methodology)*, *72*, 461–462. doi:10.1111/j.1467-9868.2010.00740.x.
- 764 Efron, B., Hastie, T., Johnstone, I., & Tibshirani, R. (2004). Least angle regression. *The Annals of Statistics*,  
765 *32*, 407–499. doi:10.1214/009053604000000067.
- 766 Elith, J., Leathwick, J. R., & Hastie, T. (2008). A working guide to boosted regression trees. *The Journal*  
767 *of Animal Ecology*, *77*, 802–813. doi:10.1111/j.1365-2656.2008.01390.x.

- 768 Friedman, J., Hastie, T., & Tibshirani, R. (2000). Additive logistic regression: a statistical view of boosting  
769 (with discussion). *The Annals of Statistics*, *28*, 337–374. doi:10.1214/aos/1016218223.
- 770 Friedman, J. H. (2001). Greedy function approximation: a gradient boosting machine. *Annals of Statistics*,  
771 *29*, 1189–1232.
- 772 Hand, D. J., & Vinciotti, V. (2003). Local versus global models for classification problems: fitting models  
773 where it matters. *The American Statistician*, *57*, 124–131. doi:10.1198/0003130031423.
- 774 Hoekstra, R., Morey, R. D., Rouder, J. N., & Wagenmakers, E.-J. (2014). Robust misinterpretation of  
775 confidence intervals. *Psychonomic Bulletin & Review*, *21*, 1157–1164. doi:10.3758/s13423-013-0572-3.
- 776 Hofner, B., Kneib, T., & Hothorn, T. (2014). A unified framework of constrained regression. *Statistics and*  
777 *Computing*, *26*, 1–14. doi:10.1007/s11222-014-9520-y.
- 778 Hofner, B., Mayr, A., Robinzonov, N., & Schmid, M. (2012). *Model-based Boosting in R: A Hands-on*  
779 *Tutorial Using the R Package mboost*. Technical Report 120 Department of Statistics, Ludwig-Maximilians-  
780 Universität Munich. URL: <http://epub.ub.uni-muenchen.de/12754/>.
- 781 Hooten, M., & Hobbs, N. T. (2015). A guide to Bayesian model selection for ecologists. *Ecological Monographs*,  
782 *85*, 3–28. doi:10.1890/14-0661.1.
- 783 Hothorn, T., Hornik, K., & Zeileis, A. (2006). Unbiased recursive partitioning: a conditional inference frame-  
784 work. *Journal of Computational and Graphical Statistics*, *15*, 651–674. doi:10.1198/106186006X133933.
- 785 Hothorn, T., Müller, J., Schröder, B., Kneib, T., & Brandl, R. (2010). Decomposing environmental, spatial,  
786 and spatiotemporal components of species distributions. *Ecological Monographs*, *81*, 329–347. doi:10.  
787 1890/10-0602.1.
- 788 Hunt, T., Bejder, L., Allen, S. J., Rankin, R. W., Hanf, D., & Parra, G. J. (2016). Demographic characteristics  
789 of Australian humpback dolphins reveal important habitat toward the south-western limit of their range.  
790 *Endangered Species Research, in review*.
- 791 Hutchinson, R., Liu, L., & Dietterich, T. (2011). Incorporating boosted regression trees into ecological latent  
792 variable models. In W. Burgard, & D. Roth (Eds.), *Proceedings of the Twenty-Fifth AAAI Conference on*  
793 *Artificial Intelligence* (pp. 1343–1348). Association for the Advancement of Artificial Intelligence.
- 794 Johnson, J. B., & Omland, K. S. (2004). Model selection in ecology and evolution. *Trends in Ecology &*  
795 *Evolution*, *19*, 101–108. doi:10.1016/j.tree.2003.10.013.
- 796 Kearns, M., & Valiant, L. (1994). Cryptographic limitations on learning Boolean formulae and finite au-  
797 tomata. *Journal of the ACM*, *41*, 67–95. doi:10.1145/174644.174647.



- 798 Kneib, T., Hothorn, T., & Tutz, G. (2009). Variable selection and model choice in geoaddivitive regression  
799 models. *Biometrics*, *65*, 626–634. doi:10.1111/j.1541-0420.2008.01112.x.
- 800 Laake, J. L. (2013). *RMark: An R Interface for Analysis of Capture-Recapture Data with MARK*. AFSC  
801 Processed Report 2013-01 Alaska Fisheries Science Center, NOAA, National Marine Fisheries Service  
802 Seattle, WA, USA.
- 803 Lebreton, J.-D., Burnham, K. P., Clobert, J., & Anderson, D. R. (1992). Modeling survival and testing  
804 biological hypotheses using marked animals: a unified approach with case studies. *Ecological Monographs*,  
805 *62*, 67–118. doi:10.2307/2937171.
- 806 Mayr, A., Fenske, N., Hofner, B., Kneib, T., & Schmid, M. (2012). Generalized additive models for location,  
807 scale and shape for high dimensional data—a flexible approach based on boosting. *Journal of the Royal*  
808 *Statistical Society: Series C (Applied Statistics)*, *61*, 403–427. doi:10.1111/j.1467-9876.2011.01033.x.
- 809 Meinshausen, N., & Bühlmann, P. (2006). High-dimensional graphs and variable selection with the Lasso.  
810 *The Annals of Statistics*, *34*, 1436–1462. doi:10.1214/009053606000000281.
- 811 Meinshausen, N., & Bühlmann, P. (2010). Stability selection. *Journal of the Royal Statistical Society: Series*  
812 *B (Statistical Methodology)*, *72*, 417–473. doi:10.1111/j.1467-9868.2010.00740.x.
- 813 Meir, R., & Rätsch, G. (2003). An introduction to boosting and leveraging. *Lecture Notes in Computer*  
814 *Science*, *2600*, 118–183. doi:10.1007/3-540-36434-X\_4.
- 815 Morey, R. D., Hoekstra, R., Rouder, J. N., Lee, M. D., & Wagenmakers, E.-J. (2016). The fallacy of  
816 placing confidence in confidence intervals. *Psychonomic Bulletin & Review*, *23*, 103–123. doi:10.3758/  
817 s13423-015-0947-8.
- 818 Mukherjee, S., Rifkin, R., & Poggio, T. (2003). Regression and Classification with Regularization. In D. D.  
819 Denison, M. H. Hansen, C. C. Holmes, B. Mallick, & B. Yu (Eds.), *Nonlinear estimation and classification*  
820 *Lecture Notes in Statistics* (pp. 111–128). New York, NY, USA: Springer.
- 821 Murphy, K. P. (2012a). Frequentist Statistics. In *Machine Learning: A Probabilistic Approach Adaptive*  
822 *Computation and Machine Learning Series* (pp. 191–216). Cambridge, MA, USA: MIT Press.
- 823 Murphy, K. P. (2012b). Markov and hidden Markov models. In *Machine Learning: A Probabilistic Approach*  
824 *Adaptive Computation and Machine Learning Series* (pp. 589–630). Cambridge, MA, USA: MIT Press.
- 825 Murphy, K. P. (2012c). Sparse Linear Models. In *Machine Learning: A Probabilistic Approach Adaptive*  
826 *Computation and Machine Learning Series* (pp. 421–478). Cambridge, MA, USA: MIT Press.
- 827 Oppel, S., Strobl, C., & Huettmann, F. (2009). *Alternative methods to quantify variable importance in*  
828 *ecology*. Technical Report 65 Department of Statistics, Ludwig-Maximilians-Universität Munich.

- 829 Pérez-Jorge, S., Gomes, I., Hayes, K., Corti, G., Louzao, M., Genovart, M., & Oro, D. (2016). Effects  
830 of nature-based tourism and environmental drivers on the demography of a small dolphin population.  
831 *Biological Conservation*, *197*, 200–208. doi:10.1016/j.biocon.2016.03.006.
- 832 Rabiner, L. R. (1989). A tutorial on hidden Markov models and selected applications in speech recognition.  
833 *Proceedings of the IEEE*, *77*, 257–286. doi:10.1109/5.18626.
- 834 Raftery, A. E. (1995). Bayesian model selection in social research. *Sociological methodology*, *25*, 111–164.
- 835 Rankin, R. W., Maldini, D., & Kaufman, G. D. (2014). Bayesian estimate of Australian humpback whale calv-  
836 ing intervals under sparse resighting rates: 1985 – 2009. *Journal of Cetacean Research and Management*,  
837 *13*, 109–121.
- 838 Rankin, R. W., Nicholson, K. E., Allen, S. J., Krützen, M., Bejder, L., & Pollock, K. H. (2016). A full-capture  
839 Hierarchical Bayesian model of Pollock’s Closed Robust Design and application to dolphins. *Frontiers in*  
840 *Marine Science*, *3*. doi:10.3389/fmars.2016.00025.
- 841 Robinzonov, N. (2013). *Advances in boosting of temporal and spatial models*. Doctoral Thesis LMU München:  
842 Fakultät für Mathematik, Informatik und Statistik Munich. URL: [http://nbn-resolving.de/urn:nbn:](http://nbn-resolving.de/urn:nbn:de:bvb:19-153382)  
843 [de:bvb:19-153382](http://nbn-resolving.de/urn:nbn:de:bvb:19-153382).
- 844 Schapire, R. E. (1990). The strength of weak learnability. *Machine Learning*, *5*, 197–227. doi:10.1023/A:  
845 1022648800760.
- 846 Schmid, M., & Hothorn, T. (2008a). Boosting additive models using component-wise P-Splines. *Computa-*  
847 *tional Statistics & Data Analysis*, *53*, 298–311. doi:10.1016/j.csda.2008.09.009.
- 848 Schmid, M., & Hothorn, T. (2008b). Flexible boosting of accelerated failure time models. *BMC Bioinforma-*  
849 *matics*, *9*, 269. doi:10.1186/1471-2105-9-269.
- 850 Schmid, M., Potapov, S., Pfahlberg, A., & Hothorn, T. (2010). Estimation and regularization techniques  
851 for regression models with multidimensional prediction functions. *Statistics and Computing*, *20*, 139–150.  
852 doi:10.1007/s11222-009-9162-7.
- 853 Schmid, M., Wickler, F., Maloney, K. O., Mitchell, R., Fenske, N., & Mayr, A. (2013). Boosted Beta  
854 Regression. *PLoS ONE*, *8*. doi:10.1371/journal.pone.0061623.
- 855 Schofield, M. R., & Barker, R. J. (2011). Full open population capture–recapture models with individual  
856 covariates. *Journal of Agricultural, Biological, and Environmental Statistics*, *16*, 253–268. doi:10.1007/  
857 s13253-010-0052-4.
- 858 Schofield, M. R., Barker, R. J., & Mackenzie, D. I. (2009). Flexible hierarchical mark-recapture modeling for  
859 open populations using WinBUGS. *Environmental and Ecological Statistics*, *16*, 369–387. doi:10.1007/  
860 s10651-007-0069-1.

- 861 Shao, J. (1993). Linear Model selection by cross-validation. *Journal of the American Statistical Association*,  
862 88, 486–494. doi:10.1080/01621459.1993.10476299.
- 863 Shao, J. (1997). An asymptotic theory for linear model selection. *Statistica Sinica*, 7, 221–242.
- 864 Simmons, J. P., Nelson, L. D., & Simonsohn, U. (2011). False-positive psychology undisclosed flexibility in  
865 data collection and analysis allows presenting anything as significant. *Psychological Science*, 22, 1359–1366.  
866 doi:10.1177/0956797611417632.
- 867 Stone, M. (1977). An asymptotic equivalence of choice of model by cross-validation and Akaike’s criterion.  
868 *Journal of the Royal Statistical Society. Series B (Methodological)*, 39, 44–47.
- 869 Taylor, A. R., Schacke, J. H., Speakman, T. R., Castleberry, S. B., & Chandler, R. B. (2016). Factors related  
870 to common bottlenose dolphin (*Tursiops truncatus*) seasonal migration along South Carolina and Georgia  
871 coasts, USA. *Animal Migration*, 3. doi:10.1515/ami-2016-0002.
- 872 Tibshirani, R. (2011). Regression shrinkage and selection via the lasso: a retrospective: Regression Shrinkage  
873 and Selection via the Lasso. *Journal of the Royal Statistical Society: Series B (Statistical Methodology)*,  
874 73, 273–282. doi:10.1111/j.1467-9868.2011.00771.x.
- 875 Tyne, J. A., Johnston, D. W., Rankin, R., Loneragan, N. R., & Bejder, L. (2015). The importance of spinner  
876 dolphin ( *Stenella longirostris* ) resting habitat: implications for management. *Journal of Applied Ecology*,  
877 52, 621–630. doi:10.1111/1365-2664.12434.
- 878 Vrieze, S. I. (2012). Model selection and psychological theory: A discussion of the differences between the  
879 Akaike information criterion (AIC) and the Bayesian information criterion (BIC). *Psychological Methods*,  
880 17, 228–243. doi:10.1037/a0027127.
- 881 Ward, G., Hastie, T., Barry, S., Elith, J., & Leathwick, J. R. (2009). Presence-only data and the EM  
882 algorithm. *Biometrics*, 65, 554–563. doi:10.1111/j.1541-0420.2008.01116.x.
- 883 White, G. C., & Burnham, K. P. (1999). Program MARK: survival estimation from populations of marked  
884 animals. *Bird Study*, 46, S120–S139. doi:10.1080/00063659909477239.
- 885 Yaffe, M. B. (2015). Reproducibility in science. *Science Signaling*, 8, EG5. doi:10.1126/scisignal.aaa5764.
- 886 Zou, H. (2006). The adaptive lasso and its oracle properties. *Journal of the American Statistical Association*,  
887 101, 1418–1429. doi:10.1198/016214506000000735.

## 888 APPENDICES

### 889 Appendix A. Algorithms for Filtering and Sampling HMM Latent States

890 The CJSboost algorithm depends on conditional independence of data pairs  $(y_{i,t}, X_{i,t})$  for individuals  $i$   
891 in capture period  $t$ , in order to estimate the negative-gradient in the descent algorithm. This is possible if

we impute information about the latent state sequences  $z$  for pairs of capture periods at  $t$  and  $t-1$ . The two CJSboost algorithms, CJSboost-EM and CJSboost-MC, achieve this same idea with two different, but related, techniques. In both cases, we will use a classic “forwards-backwards” messaging algorithm to gain information about the probability distribution of the latent state sequences. In CJSboost-EM, we calculate the *two-slice marginal probabilities*  $p(z_{t-1} = u, z_t = v | \mathbf{y}_{1:T}, \phi, p)$ , per boosting iteration; in CJSboost-MC, we will *sample*  $\mathbf{z}$  from its posterior distribution  $\pi(\mathbf{z}_{1:T} | \mathbf{y}_{1:T}, \phi, p)$ . See Rabiner (1989) and Murphy (2012b) for accessible tutorials.

Both algorithms use a forwards algorithm and backwards algorithm. We will drop the indices  $i$ , and focus on the capture history of a single individual.  $\mathbf{y}$  is the time-series of binary outcomes of length  $T$ .  $\mathbf{z}$  is a vector of latent states  $z \in \{\text{dead}, \text{alive}\}$ . We condition on an individual’s first capture at time  $t = t^0$ , and are only concerned with the sequence  $\mathbf{z}_{t^0:T}$ . Survival from step  $t-1$  to  $t$  is  $\phi_t$ . Conditional on  $z_t$ , the capture probabilities are  $p(y_t = 1 | \text{alive}) = p_t$ , and  $p(y_t = 1 | \text{dead}) = 0$ . In HMM notation, the CJS processes can be presented as the following column-stochastic matrices:

$$\Phi_t = \begin{array}{cc} & \begin{array}{cc} \text{dead} & \text{alive} \end{array} \\ \begin{array}{c} \text{dead} \\ \text{alive} \end{array} & \begin{pmatrix} 1 & 1-\phi_t \\ 0 & \phi_t \end{pmatrix} \end{array} \quad \Psi_t = \begin{array}{cc} & \begin{array}{cc} \text{dead} & \text{alive} \end{array} \\ \begin{array}{c} \text{no capture} \\ \text{capture} \end{array} & \begin{pmatrix} 1 & 1-p_t \\ 0 & p_t \end{pmatrix} \end{array} \quad (\text{A.1})$$

In HMM parlance,  $\Phi$  is the Markovian transition process; we denote the probability  $p(z_t = u | z_{t-1} = u)$  as  $\Phi_t(u, v)$ .  $\Psi$  is the emission process governing capture probabilities; we denote the probability  $p(y_t = 1 | z_t = v)$  as  $\Psi_t(v)$ .

#### Appendix A.1. Forward-algorithm

The forward messaging algorithm involves the recursive calculation of  $\alpha_t(v)$ , per time  $t$  and state  $z_t = v$ .  $\alpha_t$  is the *filtered belief state* of  $z_t$  given all the observed information in  $\mathbf{y}$  from first capture  $t^0$  until  $t$ . Notice, that for clarity, we drop the notation for conditioning on  $\phi$  and  $p$ , but these are always implied.

$$\begin{aligned} a_t(v) &:= p(z_t = v | \mathbf{y}_{t^0:t}) \\ &= \frac{1}{Z_t} p(y_t | z_t = v) p(z_t = v | \mathbf{y}_{t^0:t-1}) \\ &= \frac{1}{Z_t} p(y_t | z_t = v) \sum_u p(z_t = v | z_{t-1} = u) p(z_{t-1} = u | \mathbf{y}_{t^0:t-1}) \\ &= \frac{1}{Z_t} \Psi_t(v) \sum_u \Phi(u, v) \alpha_{t-1}(u) \\ Z_t &= \sum_v \left( \Psi_t(v) \sum_u \Phi(u, v) \alpha_{t-1}(u) \right), \sum_v \alpha_t(v) = 1 \end{aligned} \quad (\text{A.2})$$

The algorithm is initialized at time  $t^0$  (an individual’s first capture) with  $\alpha_{t^0}(\text{alive}) = 1$ . Conditional on the values of  $\alpha_t(v)$  for all  $v$ , one can proceed to calculate the next values of  $\alpha_{t+1}(v)$ , and so on, until  $t = T$ .

914 *Appendix A.2. Backwards-algorithm*

915 Messages are passed backwards in a recursive algorithm starting at  $t = T$  and moving backwards until  
916  $t = t^0$ , the first-capture period, while updating entries in  $\beta_t(v)$ .

$$\begin{aligned} \beta_{t-1}(u) &:= p(\mathbf{y}_{t:T} | z_{t-1} = u) \\ &= \sum_v p(\mathbf{y}_{t+1:T} | z_t = v) p(y_t | z_t = v) p(z_t = v | z_{t-1} = u) \\ &= \sum_v \beta_t(v) \Psi_t(v) \Phi_t(u, v) \end{aligned} \tag{A.3}$$

917 The algorithm is initialized  $\beta_T(\cdot) = 1$  for all states  $v$  (notice that the entries do not need to sum to 1).  
918 Having calculated the backwards and forwards messages, we can now proceed to characterize the latent state  
919 distributions.

920 *Appendix A.3. Two-slice marginal probabilities for Expectation-Maximization*

921 Expectation-Maximization is an iterative technique for maximizing a difficult objective function by work-  
922 ing with an easy “complete-data” objective function  $\log p(y, z | \theta)$ . EM works by cycling through an M-step  
923 and an E-step. In boosting-EM, the M-step corresponds to the usual update of the prediction vectors  
924  $F_\theta^{(m)} = F_\theta^{(m-1)} + \nu_\theta \hat{f}$  (conditional on  $z$ ), and are used to estimate  $\hat{\theta}$ . The E-step imputes expectations of the  
925 latent states  $z$ , conditional on the data and current estimates of  $\hat{\theta}^{(m)}$ .

926 In the CJSboost-EM algorithm, we require expectations for the joint states  $(z_{t-1}, z_t)$ . We substitute in  
927 the two-slice marginal probabilities  $p(z_{t-1}, z_t | \mathbf{y}_{t^0:T}, \phi, p)$ . These can be easily evaluated for a capture history  
928  $\mathbf{y}_i$  using the outputs  $(\alpha, \beta)$  from the forward-backwards algorithm.

$$\begin{aligned} w_t(u, v) &:= p(z_{t-1} = u, z_t = v | \mathbf{y}_{t^0:T}) \\ &= \frac{1}{\xi_t} p(z_{t-1} | \mathbf{y}_{t^0:t-1}) p(z_t | z_{t-1}, \mathbf{y}_{t:T}) \\ &= \frac{1}{\xi_t} p(z_{t-1} | \mathbf{y}_{t^0:t-1}) p(y_t | z_t) p(\mathbf{y}_{t+1:T} | z_t) p(z_t | z_{t-1}) \\ &= \frac{1}{\xi_t} \alpha_{t-1}(u) \Psi_t(v) \beta_t(v) \Phi_t(u, v) \end{aligned} \tag{A.4}$$

$$\xi_t = \sum_u \sum_v \alpha_{t-1}(u) \Psi_t(v) \beta_t(v) \Phi_t(u, v), \quad \sum_u \sum_v w_t(u, v) = 1$$

929 The E-step is completed after evaluating the set  $\{w_{i,t}(\text{alive, alive}), w_{i,t}(\text{alive, dead}), w_{i,t}(\text{dead, dead})\}$ , for  
930 each capture period  $t > t_i^0$  and for each individual capture history  $\{\mathbf{y}_i\}_{i=1}^n$ . This is an expensive operation;  
931 computational time can be saved by re-evaluating the expectations every second or third boosting iteration  
932  $m$ , which, for large  $m_{\text{stop}} > 100$  and small  $\nu$ , will have a negligible approximation error.

933 *Appendix A.4. Sampling state-sequences from their posterior*

934 For the CJSboost Monte-Carlo algorithm, we sample a latent state sequence  $\mathbf{z}_i$  from the posterior  
 935  $\pi(\mathbf{z}_{1:T}|\mathbf{y}_{1:T}, \phi, p)$ , for each individual  $i$  per boosting step. Conditional on the latent states, the negative-  
 936 gradients are easily evaluated and we can proceed to boost the estimates and descend the risk gradient.  
 937 However, because the algorithm is stochastic, we must avoid getting trapped in a local minima by sampling  
 938 many sequences (e.g.,  $S \approx 10-20$ ), thereby approximating the full posterior distribution of  $\mathbf{z}$ . Over all  $S$   
 939 samples, the average gradient will *probably* be in the direction of the global minima. For large  $m$  and small  
 940  $\nu$ , the approximation error is small.

The algorithm uses backwards-sampling of the posterior under the chain rule:

$$p(\mathbf{z}_{t^0:T}|\mathbf{y}_{t^0:T}) = p(z_T|\mathbf{y}_{t^0:T}) \prod_{t=T-1}^{t^0} p(z_t|z_{t+1}, \mathbf{y}_{t^0:T}) \quad (\text{A.5})$$

941 We start with a draw at time  $t = T$ ,  $z_T^{(s)} \sim p(z_T = v|\mathbf{y}_{t^0:T}) = \alpha_T(v)$ , and condition earlier states on  
 942 knowing the next-step-ahead state, proceeding backwards until  $t = t^0$ .

$$\begin{aligned} z_t^{(s)} &\sim p(z_t = u|z_{t+1} = v, \mathbf{y}_{t^0:t}) \\ &= \frac{p(z_t, z_{t+1}|\mathbf{y}_{t^0:t+1})}{p(z_{t+1}|\mathbf{y}_{t^0:t+1})} \\ &\propto \frac{p(y_{t+1}|z_{t+1})p(z_t, z_{t+1}|\mathbf{y}_{t^0:t})}{p(z_{t+1}|\mathbf{y}_{t^0:t+1})} \\ &= \frac{p(y_{t+1}|z_{t+1})p(z_{t+1}|z_t)p(z_t|\mathbf{y}_{t^0:t})}{p(z_{t+1}|\mathbf{y}_{t^0:t+1})} \\ &= \frac{\Psi_{t+1}(v)\Phi_{t+1}(u, v)\alpha_t(u)}{\alpha_{t+1}(v)} \end{aligned} \quad (\text{A.6})$$

943 Thus, knowing  $\alpha$ ,  $\beta$ ,  $\Phi$  and  $\Psi$ , we can easily generate random samples of  $\mathbf{z}$  that are drawn from its  
 944 posterior distribution. The backwards sampling step is repeated for each  $t > t_i^0$  capture period, for each  $s$   
 945 sequence, for each  $i$  capture history, for each  $m$  boosting iteration.

946 **Appendix B. Tuning Hyperparameters  $m$  and  $\nu$**

947 This section will present a simple work-flow for finding approximately optimal values of  $m_{stop}$ ,  $\nu_\phi$  and  
 948  $\nu_p$ . Our objective is to minimize the expected loss  $\mathcal{L}$ , or generalization error. We estimate  $\mathcal{L}$  through  $B$ -  
 949 times bootstrap-validation. For each  $b$  bootstrap, we create a CJSboost prediction function,  $G^{(b)}(X; m, \nu_\phi, \nu_p)$   
 950 which is trained on the bootstrapped data and is a function of the hyperparameters  $\nu_\phi$ ,  $\nu_p$  and  $m$ . We calculate  
 951 the holdout-out risk using the out-of-bootstrap  $b^c$  capture-histories and covariate data,  $(\mathbf{Y}^{(b^c)}, \mathbf{X}^{(b^c)})$ . The  
 952 average hold-out risk over  $B$  bootstraps,  $L_{cv}$ , is our objective to minimize.

$$\mathcal{L} \approx L_{cv} = \operatorname{argmin}_{m, \nu_\phi, \nu_p} \frac{1}{B} \sum_{b=1}^B L(\mathbf{Y}^{(b^c)}, G^{(b)}(\mathbf{X}^{(b^c)}; m, \nu_\phi, \nu_p))$$

953 For a given  $\nu_\phi$  and  $\nu_p$ , the hold-out risk can be monitored internally to the boosting algorithm for each  
 954 step  $m$ . Therefore, a single B-bootstrap run is all that is necessary to find the optimal  $m$ , given  $\nu_\phi$  and  
 955  $\nu_p$ . But since  $\nu_\phi$  and  $\nu_p$  are continuous, one must discretize the range of possible values and re-run separate  
 956 B-bootstrap-validation exercises per combination of  $\nu_\phi$  and  $\nu_p$ . This is very expensive, and one must accept  
 957 some approximation error.

958 *Appendix B.1. Algorithm 1 for tuning  $\nu$*

959 For just two parameters, the pertinent quantity to optimize is the ratio  $\lambda = \frac{\nu_p}{\nu_\phi}$ , for a fixed mean  $\nu_\mu =$   
 960  $\frac{1}{2}(\nu_\phi + \nu_p)$ . Therefore, a univariate discrete set of  $\Lambda = \{\lambda^{(1)}, \lambda^{(2)}, \dots, \lambda^{(J)}\}$  can be searched for the smallest  
 961  $L_{cv}(\lambda)$ .

962 This is less daunting than it may seem, because the range of  $\lambda$  is practically bounded. For example,  
 963 if  $m_{\text{stop}} = 1000$  and  $\lambda = 100$ ,  $\phi$  is effectively shrunk to its intercept starting value, and higher values of  
 964  $\lambda$  have little effect. Also, Bühlmann & Yu (2003) suggest that the generalization error has a very shallow  
 965 minima around the optimal values of  $m$ , which means that our hyperparameters need only get within the  
 966 vicinity of their optimal values, rather than strict numerical convergence. Finally,  $L_{cv}(\lambda)$  is typically convex  
 967 for varying  $\lambda$  (so long as the same bootstrap-weights are recycled for all new estimates of  $L_{cv}(\lambda)$ ). Therefore,  
 968 we can employ any convex optimization algorithm for non-differentiable functions to iteratively search for  
 969 the optimal  $\lambda$ . The thrust of any such algorithm is a multiplicative “stepping-out” procedure to quickly find  
 970 the correct order of magnitude for  $\lambda$ . For example, starting a  $\lambda^{(0)} = 1$ , we need only 7 doubling steps to grow  
 971  $\lambda$  to  $128 \times \lambda^{(0)}$ ; further refinements will have little practical impact on the final model estimates.

972 An example algorithm is the following.

- 973 1. set  $\nu_\mu = 0.01$  and  $\lambda^{(0)} = 1$ ; generate the  $B$  bootstrap samples; initialize the set  $\Lambda = \{\lambda^{(0)}, \frac{1}{2}\lambda^{(0)}\}$ ;
- 974 2. for each  $\lambda$  in  $\Lambda$ , estimate  $L_{cv}(\lambda)$  and store the values in the list  $\mathbf{L} = \{L^{(0)}, \dots\}$ ;
- 975 3. for  $j$  in  $1:J$ , do:
  - 976 (a) get the current best value for the ratio  $\lambda_{\min} = \underset{\lambda \in \Lambda}{\operatorname{argmin}} L_{cv}(\lambda)$
  - 977 (b) estimate a new candidate  $\lambda^*$ :
    - 978 if  $\lambda_{\min} = \min(\Lambda)$ , then  $\lambda^* = \frac{1}{2}\min(\Lambda)$ ;
    - 979 else if  $\lambda_{\min} = \max(\Lambda)$ , then  $\lambda^* = 2 \cdot \max(\Lambda)$ ;
    - 980 else  $\lambda^* = \lambda_{\min} + k \cdot \alpha$ , where  $k$  is the step direction and  $\alpha$  is the step size.
  - 981 (c) calculate the shrinkage weights:  $\nu_\phi^{(j)} = \frac{2 \cdot \nu_\mu}{\lambda^* + 1}$ ;  $\nu_p^{(j)} = \lambda^* \cdot \nu_\phi^{(j)}$ ;
  - 982 (d) perform bootstrap-validation to estimate  $L_{cv}^{(j)}(\lambda^*)$ ;
  - 983 (e) append  $\Lambda \leftarrow \lambda^*$  and append  $\mathbf{L} \leftarrow L_{cv}^{(j)}$ ;

984 The algorithm continues until a pre-defined convergence criteria is met, or, practically, a maximum number  
 985 of iterations is reached. The final values of  $\nu_\phi$ ,  $\nu_p$ , and  $m_{cv}$  are those which correspond to the minimum  
 986  $L_{cv} \in \mathbf{L}$ .

987 There are various convex optimization algorithms that differ in how to calculate the  $k$  and  $\alpha$ . In CJSboost,  
 988 most of the optimization benefits occur during the “stepping-out” procedure, and so exact values of  $k$  and  
 989  $\alpha$  are less important, so long as they guarantee convergence. I suggest the following sub-algorithm (nested  
 990 within step 3b above), which convergences slowly but quickly rules out large chunks of bad values of  $\lambda$ .

- 991 1. Define the triplet set  $\Gamma$  composed of the current best estimate of  $\lambda_{\min}$  as well as the values just to the  
 992 left and right, such that  $\lambda_{\min}^{-1} < \lambda_{\min} < \lambda_{\min}^{+1}$ ;
- 993 2. Sort the entries of  $\Gamma$  according to the order  $L_{cv}(\gamma^{(1)}) < L_{cv}(\gamma^{(2)}) < L_{cv}(\gamma^{(3)})$ ;
- 994 3. Estimate the step size and direction:  
 995 if  $\|\gamma^{(1)} - \gamma^{(2)}\| \geq \|\gamma^{(1)} - \gamma^{(3)}\|$ :  
 996 then  $\alpha = \frac{1}{2}\|\gamma^{(1)} - \gamma^{(2)}\|$  and  $k = \text{sign}(\gamma^{(1)} - \gamma^{(2)})$ ;  
 997 else  $\alpha = \frac{1}{2}\|\gamma^{(1)} - \gamma^{(3)}\|$  and  $k = \text{sign}(\gamma^{(1)} - \gamma^{(3)})$ ;
- 998 4.  $\lambda^* = \lambda_{\min} + k \cdot \alpha$

999 Typically seven or ten iterations are necessary in order to find suitable values of  $\lambda$ ,  $\nu_\phi$  and  $\nu_p$ . Unfortunately,  
 1000 this strategy is only for a two-parameter likelihood with a single ratio to optimize. For other capture-recapture  
 1001 models with more parameters (e.g., POPAN, PCRD), a different tuning strategy will be necessary.

#### 1002 *Appendix B.2. Algorithm 2 for tuning $\nu$*

1003 With more parameters in the capture-recapture likelihood, the number of necessary steps in algorithm  
 1004 1 will increase exponentially. I suggest a second iterative algorithm whose number of iterations may only  
 1005 increase linearly with the number of parameters. The principle of this second algorithm is based on the  
 1006 observation that when the ratio  $\frac{\nu_p}{\nu_\phi}$  is poorly optimized, then additional boosting steps along the gradient  
 1007  $\frac{\partial \ell}{\partial F_\theta}$  will result in *increases* in the holdout-risk, and will do so asymmetrically for  $F_\phi$  vs  $F_p$ . When  $\frac{\nu_p}{\nu_\phi}$   
 1008 is optimized, the number of boosting steps which increase the hold-out risk will be roughly the same for  $p$  and  
 1009  $\phi$ , averaged over all bootstrap hold-out samples. I suggest using this ratio as an estimate of  $\hat{\lambda} = \frac{\nu_p}{\nu_\phi}$ .

1010 Call  $\Delta_\theta^{(m)}$  a boosting step along the partial derivative of  $\frac{\partial \ell}{\partial F_\theta}$  which successfully reduces the holdout-risk.

$$\hat{\lambda}^{(j)} = \hat{\lambda}^{(j-1)} Q \left( \frac{\sum_{m=1}^{m_k} \Delta_p^{(m)}}{\sum_{m=1}^{m_k} \Delta_\phi^{(m)}} \right) \quad (\text{B.1})$$

1011 where  $Q$  is a robust measure of central tendency over all  $B$  bootstraps (median, trimmed-mean), and  $m_k$   
 1012 is some boosting step  $m_k > m_{cv}$ . The first estimate  $\hat{\lambda}^{(1)}$  is typically an underestimate, so the algorithm is  
 1013 iterated, each time using the previous  $\hat{\lambda}^{(j-1)}$  for a current estimate of  $\nu_p$  and  $\nu_\phi$  with which to perform a  
 1014 bootstrap-validation exercise, and then updating  $\hat{\lambda}^{(j)}$  by (B.1).  $\hat{\lambda}^{(j)}$  typically converges to a single value  
 1015 within approximately 10 iterations.  $\hat{\lambda}^{(j)}$  is *not* the optimal  $\lambda$  as estimated by algorithm 1, but it is in the  
 1016 vicinity (Figure B.9).

1017 Clearly, for just two parameters and one ratio, this second algorithm is not competitive with algorithm  
 1018 1. But, when there are more than two parameters in the likelihood, this algorithm can simultaneously



1019 estimate all pertinent ratios. Further refinements will be necessary, but simulations demonstrate that there  
1020 is information in the risk gradient trajectories that can help optimize the hyperparameters.

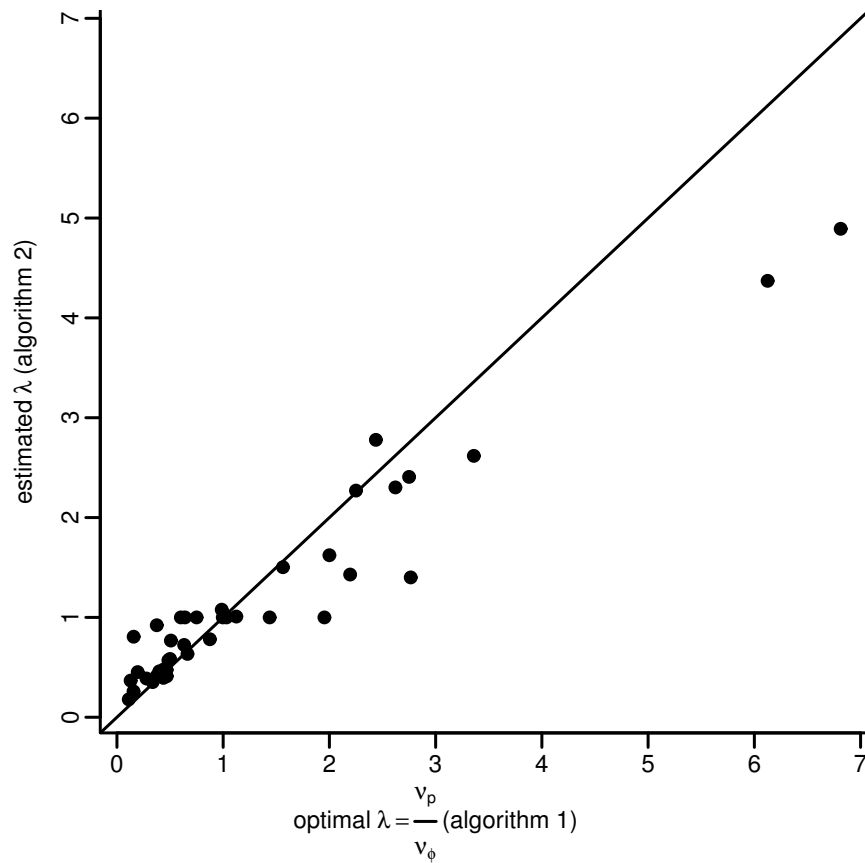

Figure B.9: Two algorithms for tuning the shrinkage weight hyperparameters  $\nu_\phi$  and  $\nu_p$ , and their ratio  $\lambda$ , in order to minimize the expected loss (estimated via bootstrap-validation). Forty simulations compare the two algorithms, where algorithm 1 is considered optimal.
